# Supplementary material for: Mechanistic studies on the formation of ternary oxides by thermal oxidation of the cubic laves phase CaAl2
Source: Royal Society of Chemistry journal article supplement (doi:10.1039/d3qi01604h), 2023-11-14
Supplement: d3qi01604h1.pdf [file d3qi01604h1.pdf]

# SUPPORTING INFORMATION

## **Mechanistic Studies on the Formation of Ternary Oxides by Thermal Oxidation of the Cubic Laves Phase $\text{CaAl}_2$**

Elias C. J. Giebelmann, Stefan Engel, Johannes G. Volpini, Hubert Huppertz, Guido Kickelbick,\* Oliver Janka\*

**Elias C. J. Giebelmann, Stefan Engel**, Anorganische Festkörperchemie, Universität des Saarlandes, Campus C4.1, 66123 Saarbrücken, Germany

**Johannes G. Volpini, Hubert Huppertz**, Institute for General, Inorganic and Theoretical Chemistry, University of Innsbruck, Innrain 80-82, 6020 Innsbruck, Austria

\* **Corresponding authors: Oliver Janka**, Anorganische Festkörperchemie, Universität des Saarlandes, Campus C4.1, 66123 Saarbrücken, Germany, e-mail: [oliver.janka@uni-saarland.de](mailto:oliver.janka@uni-saarland.de)

**Guido Kickelbick**, Anorganische Festkörperchemie, Universität des Saarlandes, Campus C4.1, 66123 Saarbrücken, Germany, e-mail: [guido.kickelbick@uni-saarland.de](mailto:guido.kickelbick@uni-saarland.de)

**Table S1.** Summary of the Rietveld fit results of the powder X-ray diffraction data collected from the samples oxidized in a muffle furnace in air. Five samples were simultaneously heated to 1273 K ( $\sim 15 \text{ K min}^{-1}$ ) with a dwell time of 1 h.

| dwelling<br>time (h) | phase contributions obtained by PXRD (mass%) |                           |     |                         |      |
|----------------------|----------------------------------------------|---------------------------|-----|-------------------------|------|
|                      | $\text{Ca}_{12}\text{Al}_{14}\text{O}_{33}$  | $\text{CaAl}_2\text{O}_4$ | CaO | $\text{Al}_2\text{O}_3$ | Al   |
| 5                    | 67.1                                         | 13.0                      | 1.8 | 6.8                     | 11.3 |
| 5                    | 63.1                                         | 20.7                      | 1.9 | 7.5                     | 6.8  |
| 5                    | 67.5                                         | 14.5                      | 2.1 | 7.7                     | 8.2  |
| 5                    | 65.0                                         | 17.6                      | 1.7 | 7.4                     | 8.3  |
| 5                    | 67.9                                         | 15.7                      | 2.4 | 7.2                     | 6.8  |
| average              | 66.1                                         | 16.3                      | 2.0 | 7.3                     | 8.3  |

**Table S2.** Summary of the Rietveld fit results of the powder X-ray diffraction data collected from the sample repeatedly oxidized in a muffle furnace in air for 5 h. The sample was heated to 1273 K ( $\sim 15 \text{ K min}^{-1}$ ) with a dwelling time of 5h over the course of 100 h.

| dwelling<br>time (h) | phase contributions obtained by PXRD (mass%) |                           |     |                         |    |
|----------------------|----------------------------------------------|---------------------------|-----|-------------------------|----|
|                      | $\text{Ca}_{12}\text{Al}_{14}\text{O}_{33}$  | $\text{CaAl}_2\text{O}_4$ | CaO | $\text{Al}_2\text{O}_3$ | Al |
| 5                    | 70                                           | 12                        | 1   | 10                      | 7  |
| 10                   | 65                                           | 16                        | 1   | 13                      | 5  |
| 15                   | 59                                           | 20                        | 1   | 16                      | 4  |
| 20                   | 57                                           | 25                        | 0   | 16                      | 2  |
| 25                   | 51                                           | 31                        | 0   | 16                      | 2  |
| 30                   | 43                                           | 39                        | 0   | 17                      | 1  |
| 35                   | 39                                           | 44                        | 0   | 16                      | 1  |
| 40                   | 35                                           | 49                        | 0   | 15                      | 1  |
| 45                   | 31                                           | 54                        | 0   | 14                      | 1  |
| 50                   | 27                                           | 59                        | 0   | 13                      | 1  |
| 55                   | 23                                           | 64                        | 0   | 13                      | 0  |
| 60                   | 20                                           | 69                        | 0   | 11                      | 0  |
| 65                   | 16                                           | 74                        | 0   | 10                      | 0  |
| 70                   | 13                                           | 78                        | 0   | 9                       | 0  |
| 75                   | 11                                           | 80                        | 0   | 9                       | 0  |
| 80                   | 8                                            | 83                        | 0   | 9                       | 0  |
| 85                   | 6                                            | 87                        | 0   | 7                       | 0  |
| 90                   | 4                                            | 89                        | 0   | 7                       | 0  |
| 95                   | 2                                            | 91                        | 0   | 7                       | 0  |
| 100                  | 2                                            | 92                        | 0   | 6                       | 0  |

**Table S3.** Summary of the quantum-chemical calculations on the DFT Level. The compounds are sorted by increasing Ca content.

| Compound                                          | space group                         | Z  | E/unit cell (eV) | E/atom (eV) |
|---------------------------------------------------|-------------------------------------|----|------------------|-------------|
| Al <sub>2</sub> O <sub>3</sub>                    | <i>R</i> $\bar{3}c$                 | 6  | -236.03          | -7.87       |
| CaAl <sub>12</sub> O <sub>19</sub>                | <i>P6</i> <sub>3</sub> / <i>mmc</i> | 2  | -498.75          | -7.79       |
| CaAl <sub>4</sub> O <sub>7</sub>                  | <i>C2</i> <sub>1</sub> / <i>c</i>   | 4  | -367.80          | -7.66       |
| CaAl <sub>2</sub> O <sub>4</sub>                  | <i>P2</i> <sub>1</sub> / <i>c</i>   | 12 | -632.88          | -7.53       |
| Ca <sub>5</sub> Al <sub>6</sub> O <sub>14</sub>   | <i>Cmc2</i> <sub>1</sub>            | 4  | -741.48          | -7.41       |
| Ca <sub>12</sub> Al <sub>14</sub> O <sub>33</sub> | <i>I</i> $\bar{4}3d$                | 4  | -853.76          | -7.36       |
| Ca <sub>3</sub> Al <sub>2</sub> O <sub>6</sub>    | <i>Pa</i> $\bar{3}$                 | 24 | -1908.38         | -7.23       |
| CaO                                               | <i>Fm</i> $\bar{3}m$                | 4  | -53.64           | -6.71       |

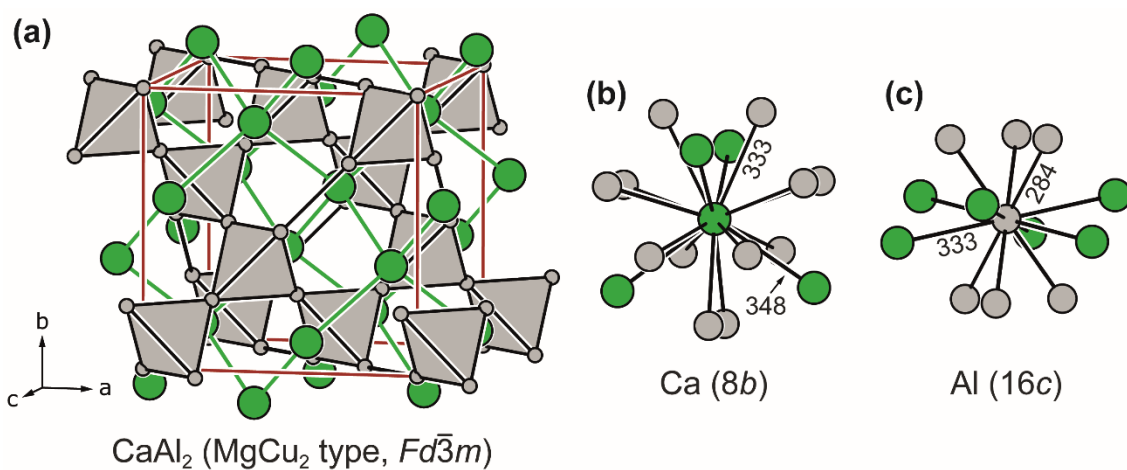

**Figure S1.** (a) Unit cell and coordination polyhedra of the (b) Ca and (c) Al atoms in cubic  $\text{CaAl}_2$  ( $Fd\bar{3}m$ ,  $\text{MgCu}_2$  type). Ca atoms are depicted in green, Al atoms as grey circles. Wyckoff positions and site symmetries are given.

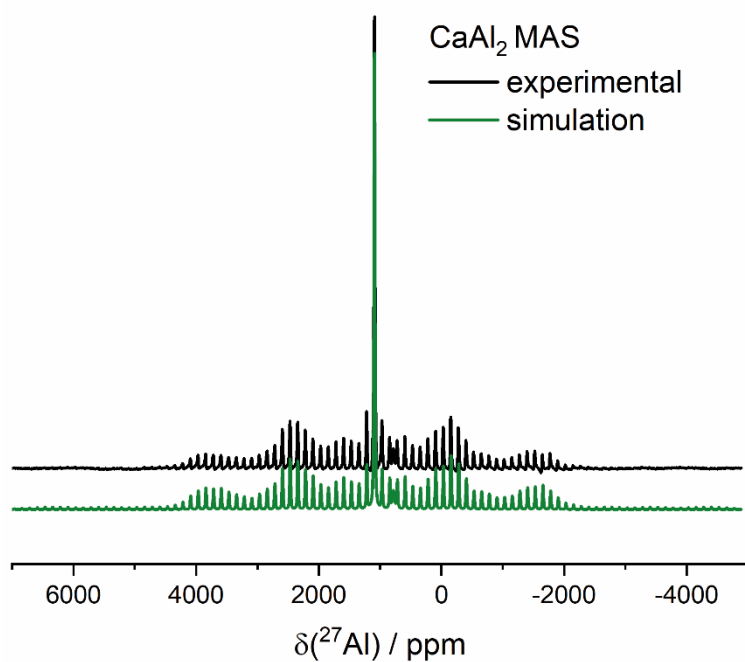

**Figure S2.**  $^{27}\text{Al}$  solid state MAS NMR for cubic  $\text{CaAl}_2$  ( $\text{MgCu}_2$  type). The experimental data is shown in black, the fit in green.

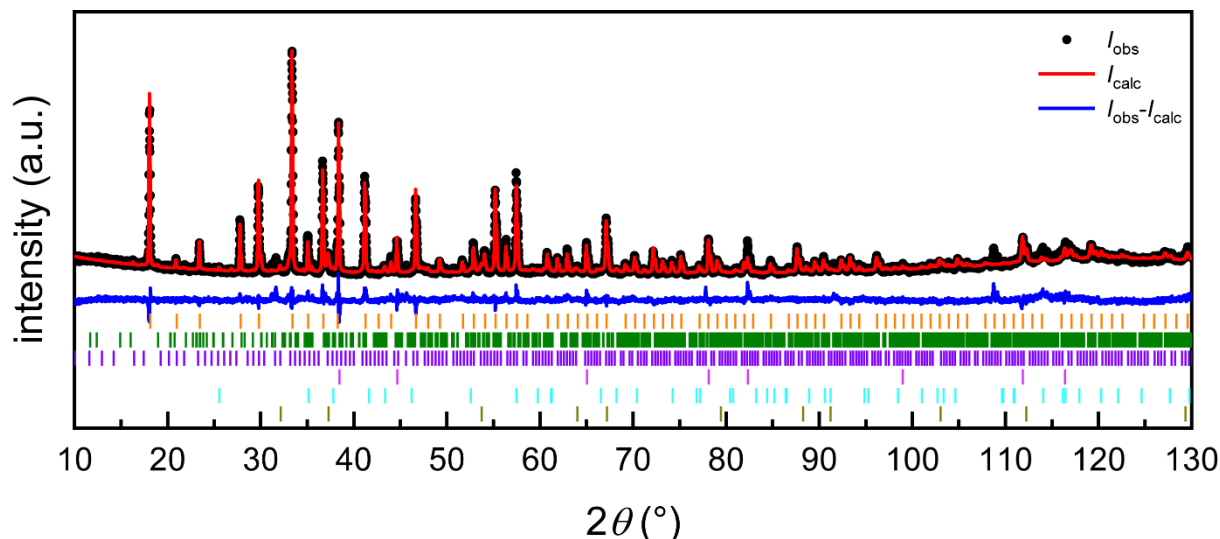

**Figure S3.** Rietveld fit of the powder X-ray diffraction pattern of  $\text{CaAl}_2$  oxidized by the following conditions: STA; heating rate:  $20 \text{ K min}^{-1}$ ; dwelling time: 0 h; gas flow:  $40 \text{ mL min}^{-1} \text{ Ar} : 10 \text{ mL min}^{-1} \text{ O}_2$ . The ticks indicate the Bragg positions for  $\text{Ca}_{12}\text{Al}_{14}\text{O}_{33}$  (orange),  $\text{CaAl}_2\text{O}_4$  (green),  $\text{Ca}_3\text{Al}_2\text{O}_6$  (purple), elemental Al (pink),  $\text{Al}_2\text{O}_3$  (cyan), CaO (olive).

| Refinement details for the data shown in Figure S3 |                                                              |                           |                                    |              |                         |              |
|----------------------------------------------------|--------------------------------------------------------------|---------------------------|------------------------------------|--------------|-------------------------|--------------|
| Source                                             | Bruker D8 ADVANCE (laboratory X-ray)                         |                           |                                    |              |                         |              |
| Temperature                                        | RT                                                           |                           |                                    |              |                         |              |
| Pressure                                           | ambient                                                      |                           |                                    |              |                         |              |
| Wavelengths                                        | Cu $K\alpha_1$ and Cu $K\alpha_2$ : 154.0596 and 154.4308 pm |                           |                                    |              |                         |              |
| Chemical formula                                   | $\text{Ca}_{12}\text{Al}_{14}\text{O}_{33}$                  | $\text{CaAl}_2\text{O}_4$ | $\text{Ca}_3\text{Al}_2\text{O}_6$ | Al           | $\text{Al}_2\text{O}_3$ | CaO          |
| Abbreviation                                       | C12A7                                                        | CA                        | C3A1                               | –            | –                       | –            |
| Space group                                        | $I\bar{4}3d$                                                 | $P2_1/c$                  | $Pa\bar{3}$                        | $Fm\bar{3}m$ | $R\bar{3}c$             | $Fm\bar{3}m$ |
| $a / \text{pm}$                                    | 1197.86(2)                                                   | 875.0(10)                 | 1527.0(6)                          | 405.27(1)    | 475.65(11)              | 482.04(6)    |
| $b / \text{pm}$                                    | $A$                                                          | 809.2(4)                  | $a$                                | $A$          | $a$                     | $a$          |
| $c / \text{pm}$                                    | $A$                                                          | 1748.2(18)                | $a$                                | $A$          | 1300.6(6)               | $a$          |
| $\beta / ^\circ$                                   | 90                                                           | 120.00(14)                | 90                                 | 90           | 90                      | 90           |
| $V / \text{nm}^3$                                  | 1.7189                                                       | 1.0720                    | 3.5600                             | 0.0666       | 0.2548                  | 0.1120       |
| $Z$                                                | 4                                                            | 12                        | 24                                 | 4            | 6                       | 4            |
| $d$ -space range                                   | 0.85–14.35 Å (6–130° $2\theta$ )                             |                           |                                    |              |                         |              |
| $\chi^2$                                           | 3.30                                                         |                           |                                    |              |                         |              |
| $R_p$                                              | 6.89                                                         |                           |                                    |              |                         |              |
| $R_{wp}$                                           | 9.32                                                         |                           |                                    |              |                         |              |
| Definition of $R$ factors                          | $R_p = \frac{\sum  w   I_0 - I_c ^2}{\sum  w  I_0^2}$        |                           |                                    |              |                         |              |

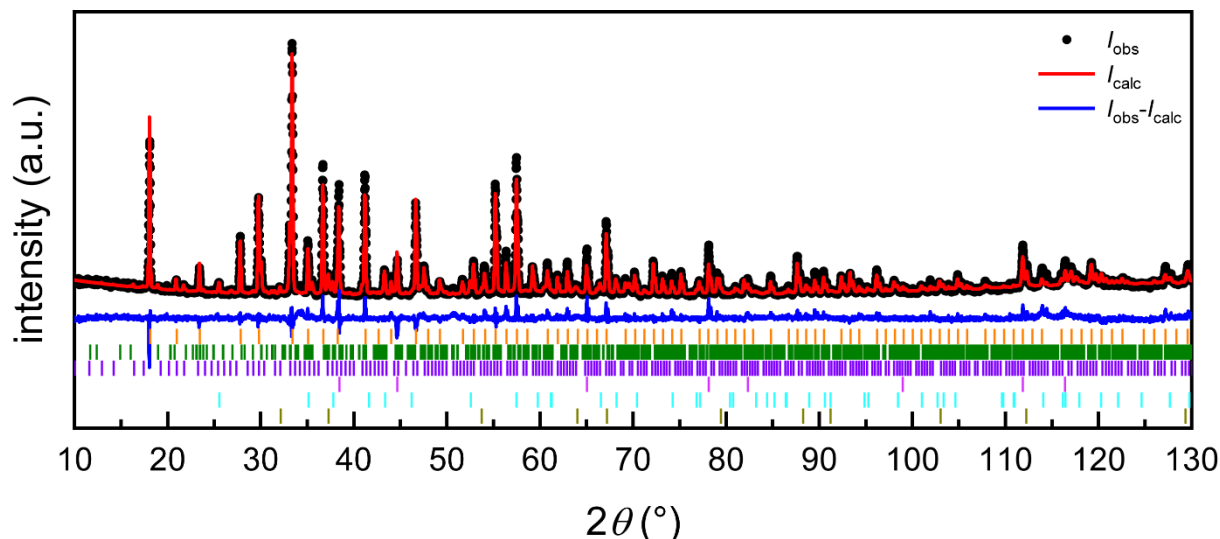

**Figure S4.** Rietveld fit of the powder X-ray diffraction pattern of  $\text{CaAl}_2$  oxidized by the following conditions: STA; heating rate:  $20 \text{ K min}^{-1}$ ; dwelling time: 5 h; gas flow:  $40 \text{ mL min}^{-1} \text{ Ar} : 10 \text{ mL min}^{-1} \text{ O}_2$ . The ticks indicate the Bragg positions for  $\text{Ca}_{12}\text{Al}_{14}\text{O}_{33}$  (orange),  $\text{CaAl}_2\text{O}_4$  (green),  $\text{Ca}_3\text{Al}_2\text{O}_6$  (purple), elemental Al (pink),  $\text{Al}_2\text{O}_3$  (cyan), CaO (olive).

| Refinement details for the data shown in Figure S4 |                                                              |                           |                                    |              |                         |              |
|----------------------------------------------------|--------------------------------------------------------------|---------------------------|------------------------------------|--------------|-------------------------|--------------|
| Source                                             | Bruker D8 ADVANCE (laboratory X-ray)                         |                           |                                    |              |                         |              |
| Temperature                                        | RT                                                           |                           |                                    |              |                         |              |
| Pressure                                           | ambient                                                      |                           |                                    |              |                         |              |
| Wavelengths                                        | Cu $K\alpha_1$ and Cu $K\alpha_2$ : 154.0596 and 154.4308 pm |                           |                                    |              |                         |              |
| Chemical formula                                   | $\text{Ca}_{12}\text{Al}_{14}\text{O}_{33}$                  | $\text{CaAl}_2\text{O}_4$ | $\text{Ca}_3\text{Al}_2\text{O}_6$ | Al           | $\text{Al}_2\text{O}_3$ | CaO          |
| Abbreviation                                       | C12A7                                                        | CA                        | C3A1                               | –            | –                       | –            |
| Space group                                        | $\bar{I}43d$                                                 | $P2_1/c$                  | $Pa\bar{3}$                        | $Fm\bar{3}m$ | $R\bar{3}c$             | $Fm\bar{3}m$ |
| $a / \text{pm}$                                    | 1197.79(1)                                                   | 875.7(3)                  | 1526.78(4)                         | 405.20(7)    | 476.01(3)               | 481.50(7)    |
| $b / \text{pm}$                                    | $a$                                                          | 809.05(18)                | $a$                                | $a$          | $a$                     | $a$          |
| $c / \text{pm}$                                    | $a$                                                          | 1745.4(6)                 | $a$                                | $a$          | 1299.66(14)             | $a$          |
| $\beta / ^\circ$                                   | 90                                                           | 119.99(4)                 | 90                                 | 90           | 90                      | 90           |
| $V / \text{nm}^3$                                  | 1.7184                                                       | 1.0710                    | 3.5590                             | 0.0665       | 0.2550                  | 0.1116       |
| $Z$                                                | 4                                                            | 12                        | 24                                 | 4            | 6                       | 4            |
| $d$ -space range                                   | 0.85–14.35 Å (6–130° $2\theta$ )                             |                           |                                    |              |                         |              |
| $\chi^2$                                           | 3.92                                                         |                           |                                    |              |                         |              |
| $R_p$                                              | 7.08                                                         |                           |                                    |              |                         |              |
| $R_{wp}$                                           | 9.60                                                         |                           |                                    |              |                         |              |
| Definition of $R$ factors                          | $R_p = \frac{\sum  w   I_o - I_c ^2}{\sum  w  I_o^2}$        |                           |                                    |              |                         |              |

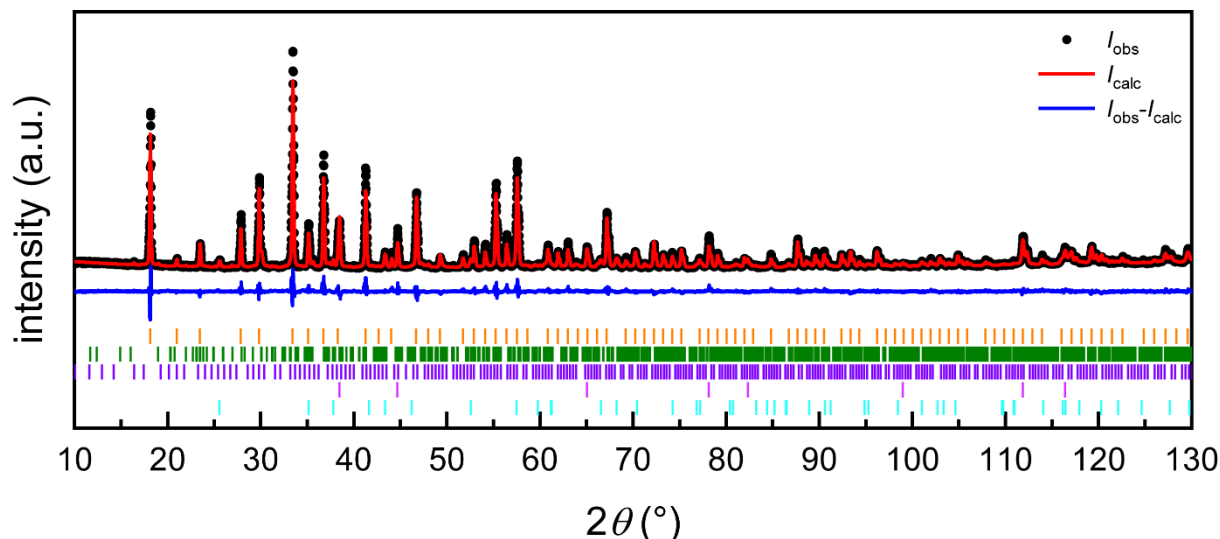

**Figure S5.** Rietveld fit of the powder X-ray diffraction pattern of  $\text{CaAl}_2$  oxidized by the following conditions: STA; heating rate:  $5 \text{ K min}^{-1}$ ; dwelling time: 0 h; gas flow:  $40 \text{ mL min}^{-1} \text{ Ar} : 40 \text{ mL min}^{-1} \text{ O}_2$ . The ticks indicate the Bragg positions for  $\text{Ca}_{12}\text{Al}_{14}\text{O}_{33}$  (orange),  $\text{CaAl}_2\text{O}_4$  (green),  $\text{Ca}_3\text{Al}_2\text{O}_6$  (purple), elemental Al (pink),  $\text{Al}_2\text{O}_3$  (cyan), CaO (olive).

| Refinement details for the data shown in Figure S5 |                                                              |                           |                                    |              |                         |
|----------------------------------------------------|--------------------------------------------------------------|---------------------------|------------------------------------|--------------|-------------------------|
| Source                                             | Bruker D8 ADVANCE (laboratory X-ray)                         |                           |                                    |              |                         |
| Temperature                                        | RT                                                           |                           |                                    |              |                         |
| Pressure                                           | ambient                                                      |                           |                                    |              |                         |
| Wavelengths                                        | Cu $K\alpha_1$ and Cu $K\alpha_2$ : 154.0596 and 154.4308 pm |                           |                                    |              |                         |
| Chemical formula                                   | $\text{Ca}_{12}\text{Al}_{14}\text{O}_{33}$                  | $\text{CaAl}_2\text{O}_4$ | $\text{Ca}_3\text{Al}_2\text{O}_6$ | Al           | $\text{Al}_2\text{O}_3$ |
| Abbreviation                                       | C12A7                                                        | CA                        | C3A1                               | –            | –                       |
| Space group                                        | $I\bar{4}3d$                                                 | $P2_1/c$                  | $Pa\bar{3}$                        | $Fm\bar{3}m$ | $R\bar{3}c$             |
| $a / \text{pm}$                                    | 1197.87(11)                                                  | 874.7(9)                  | 1522.5(3)                          | 405.32(8)    | 476.00(3)               |
| $b / \text{pm}$                                    | $a$                                                          | 809.9(3)                  | $a$                                | $a$          | $a$                     |
| $c / \text{pm}$                                    | $a$                                                          | 1746.8(19)                | $a$                                | $a$          | 1300.27(18)             |
| $\beta / ^\circ$                                   | 90                                                           | 120.00(13)                | 90                                 | 90           | 90                      |
| $V / \text{nm}^3$                                  | 1.7188                                                       | 1.0720                    | 3.5290                             | 0.0666       | 0.2551                  |
| $Z$                                                | 4                                                            | 12                        | 24                                 | 4            | 6                       |
| $d$ -space range                                   | 0.85-14.35 Å (6-130° $2\theta$ )                             |                           |                                    |              |                         |
| $\chi^2$                                           | 6.39                                                         |                           |                                    |              |                         |
| $R_p$                                              | 8.28                                                         |                           |                                    |              |                         |
| $R_{wp}$                                           | 11.20                                                        |                           |                                    |              |                         |
| Definition of $R$ factors                          | $R_p = \frac{\sum  w   I_0 - I_c ^2}{\sum  w I_0^2 }$        |                           |                                    |              |                         |

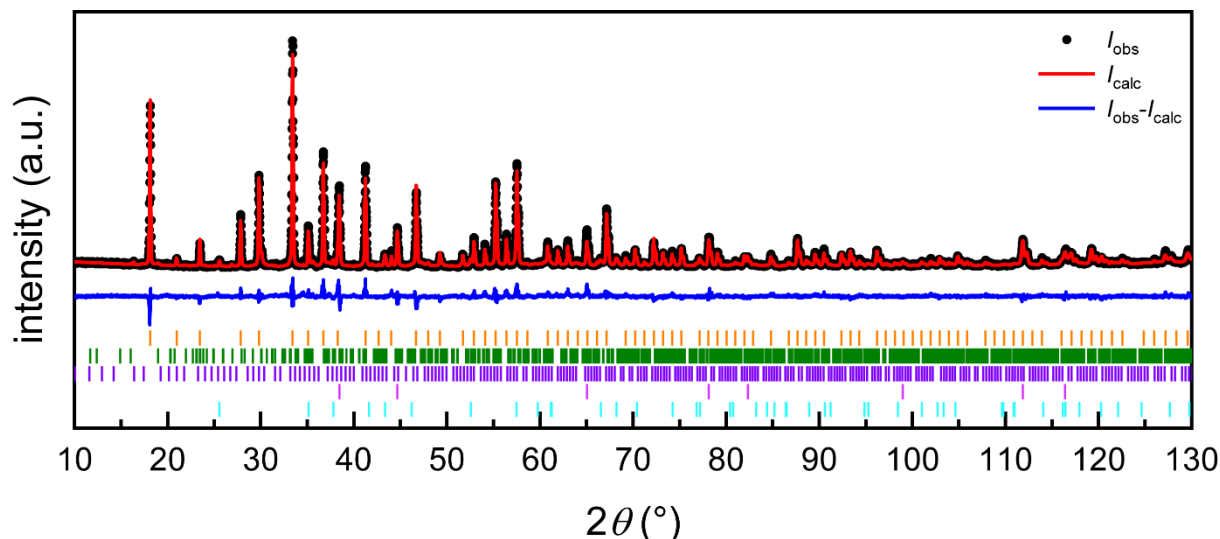

**Figure S6.** Rietveld fit of the powder X-ray diffraction pattern of CaAl<sub>2</sub> oxidized by the following conditions: STA; heating rate: 10 K min<sup>-1</sup>; dwelling time: 0 h; gas flow: 40 mL min<sup>-1</sup> Ar : 40 mL min<sup>-1</sup> O<sub>2</sub>. The ticks indicate the Bragg positions for Ca<sub>12</sub>Al<sub>14</sub>O<sub>33</sub> (orange), CaAl<sub>2</sub>O<sub>4</sub> (green), Ca<sub>3</sub>Al<sub>2</sub>O<sub>6</sub> (purple), elemental Al (pink), Al<sub>2</sub>O<sub>3</sub> (cyan), CaO (olive).

| Refinement details for the data shown in Figure S6 |                                                                                      |                                  |                                                |              |                                |
|----------------------------------------------------|--------------------------------------------------------------------------------------|----------------------------------|------------------------------------------------|--------------|--------------------------------|
| Source                                             | Bruker D8 ADVANCE (laboratory X-ray)                                                 |                                  |                                                |              |                                |
| Temperature                                        | RT                                                                                   |                                  |                                                |              |                                |
| Pressure                                           | ambient                                                                              |                                  |                                                |              |                                |
| Wavelengths                                        | Cu K $\alpha$ <sub>1</sub> and Cu K $\alpha$ <sub>2</sub> : 154.0596 and 154.4308 pm |                                  |                                                |              |                                |
| Chemical formula                                   | Ca <sub>12</sub> Al <sub>14</sub> O <sub>33</sub>                                    | CaAl <sub>2</sub> O <sub>4</sub> | Ca <sub>3</sub> Al <sub>2</sub> O <sub>6</sub> | Al           | Al <sub>2</sub> O <sub>3</sub> |
| Abbreviation                                       | C12A7                                                                                | CA                               | C3A1                                           | –            | –                              |
| Space group                                        | $I\bar{4}3d$                                                                         | $P2_1/c$                         | $Pa\bar{3}$                                    | $Fm\bar{3}m$ | $R\bar{3}c$                    |
| <i>a</i> / pm                                      | 1197.86(1)                                                                           | 874.5(13)                        | 1522.0(6)                                      | 405.33(6)    | 476.01(3)                      |
| <i>b</i> / pm                                      | <i>a</i>                                                                             | 810.5(4)                         | <i>a</i>                                       | <i>a</i>     | <i>a</i>                       |
| <i>c</i> / pm                                      | <i>a</i>                                                                             | 1747(3)                          | <i>a</i>                                       | <i>a</i>     | 1300.28(18)                    |
| $\beta$ / °                                        | 90                                                                                   | 119.99(16)                       | 90                                             | 90           | 90                             |
| <i>V</i> / nm <sup>3</sup>                         | 1.7187                                                                               | 1.0730                           | 3.5260                                         | 0.0666       | 0.2552                         |
| <i>Z</i>                                           | 4                                                                                    | 12                               | 24                                             | 4            | 6                              |
| <i>d</i> -space range                              | 0.85–14.35 Å (6–130° 2 $\theta$ )                                                    |                                  |                                                |              |                                |
| $\chi^2$                                           | 4.24                                                                                 |                                  |                                                |              |                                |
| <i>R</i> <sub>p</sub>                              | 6.75                                                                                 |                                  |                                                |              |                                |
| <i>R</i> <sub>wp</sub>                             | 8.94                                                                                 |                                  |                                                |              |                                |
| Definition of <i>R</i> factors                     | $R_p = \frac{\sum  w   I_o - I_c ^2}{\sum  w  I_o^2}^{1/2}$                          |                                  |                                                |              |                                |



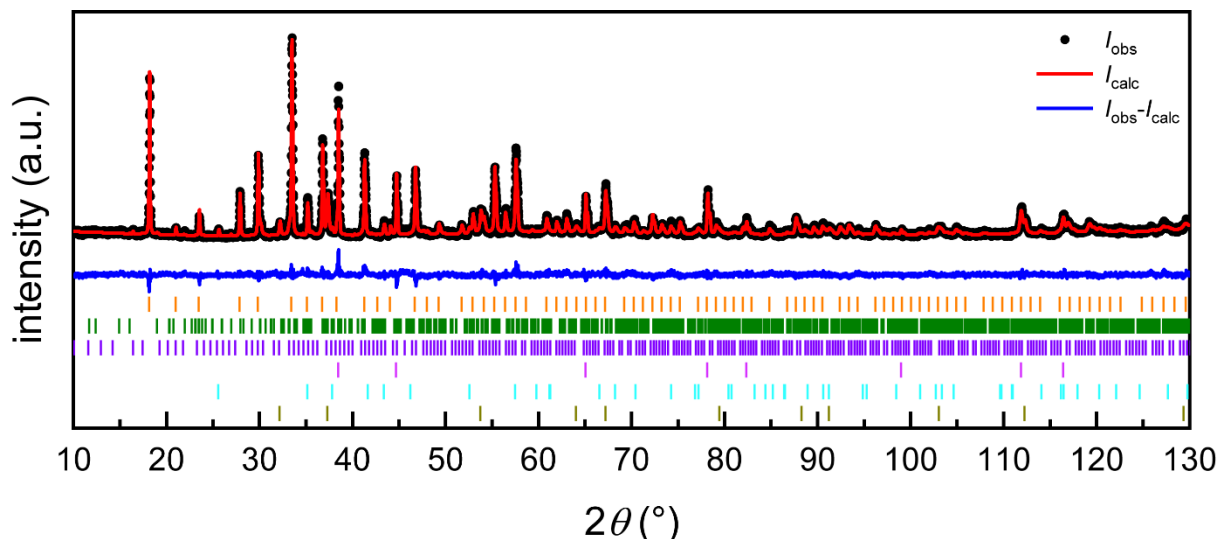

**Figure S7.** Rietveld fit of the powder X-ray diffraction pattern of  $\text{CaAl}_2$  oxidized by the following conditions: STA; heating rate:  $20 \text{ K min}^{-1}$ ; dwelling time: 0 h; gas flow:  $40 \text{ mL min}^{-1} \text{ Ar} : 40 \text{ mL min}^{-1} \text{ O}_2$ . The ticks indicate the Bragg positions for  $\text{Ca}_{12}\text{Al}_{14}\text{O}_{33}$  (orange),  $\text{CaAl}_2\text{O}_4$  (green),  $\text{Ca}_3\text{Al}_2\text{O}_6$  (purple), elemental Al (pink),  $\text{Al}_2\text{O}_3$  (cyan), CaO (olive).

| Refinement details for the data shown in Figure S7 |                                                                                                                                              |                           |                                    |              |                         |              |
|----------------------------------------------------|----------------------------------------------------------------------------------------------------------------------------------------------|---------------------------|------------------------------------|--------------|-------------------------|--------------|
| Source                                             | Bruker D8 ADVANCE (laboratory X-ray)                                                                                                         |                           |                                    |              |                         |              |
| Temperature                                        | RT                                                                                                                                           |                           |                                    |              |                         |              |
| Pressure                                           | ambient                                                                                                                                      |                           |                                    |              |                         |              |
| Wavelengths                                        | Cu $K\alpha_1$ and Cu $K\alpha_2$ : 154.0596 and 154.4308 pm                                                                                 |                           |                                    |              |                         |              |
| Chemical formula                                   | $\text{Ca}_{12}\text{Al}_{14}\text{O}_{33}$                                                                                                  | $\text{CaAl}_2\text{O}_4$ | $\text{Ca}_3\text{Al}_2\text{O}_6$ | Al           | $\text{Al}_2\text{O}_3$ | CaO          |
| Abbreviation                                       | C12A7                                                                                                                                        | CA                        | C3A1                               | –            | –                       | –            |
| Space group                                        | $\bar{I}43d$                                                                                                                                 | $P2_1/c$                  | $Pa\bar{3}$                        | $Fm\bar{3}m$ | $R\bar{3}c$             | $Fm\bar{3}m$ |
| $a / \text{pm}$                                    | 1198.00(2)                                                                                                                                   | 874(2)                    | 1526.5(4)                          | 405.31(1)    | 1300.7(3)               | 482.01(2)    |
| $b / \text{pm}$                                    | $a$                                                                                                                                          | 811.8(6)                  | $a$                                | $a$          | $a$                     | $a$          |
| $c / \text{pm}$                                    | $a$                                                                                                                                          | 1750(6)                   | $a$                                | $a$          | 475.93(5)               | $a$          |
| $\beta / ^\circ$                                   | 90                                                                                                                                           | 120.0(4)                  | 90                                 | 90           | 90                      | 90           |
| $V / \text{nm}^3$                                  | 1.7194                                                                                                                                       | 1.0756                    | 3.5570                             | 0.0666       | 0.2552                  | 0.1120       |
| $Z$                                                | 4                                                                                                                                            | 12                        | 24                                 | 4            | 6                       | 4            |
| $d$ -space range                                   | 0.85-14.35 Å (6-130° $2\theta$ )                                                                                                             |                           |                                    |              |                         |              |
| $\chi^2$                                           | 1.85                                                                                                                                         |                           |                                    |              |                         |              |
| $R_p$                                              | 7.15                                                                                                                                         |                           |                                    |              |                         |              |
| $R_{wp}$                                           | 9.10                                                                                                                                         |                           |                                    |              |                         |              |
| Definition of $R$ factors                          | $R_p = \frac{\sum  w   I_0 - I_c ^2}{\sum  w  I_0^2};$ $R_{wp} = \left( \frac{\sum  w   I_0 - I_c ^2}{\sum  w  I_0^2} \right)^{\frac{1}{2}}$ |                           |                                    |              |                         |              |

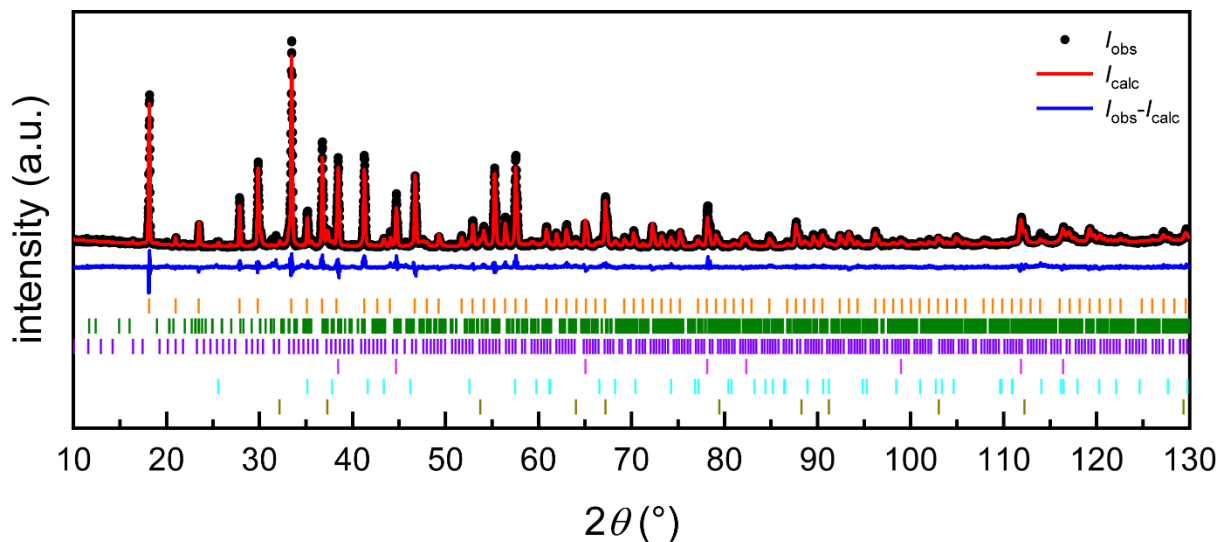

**Figure S8.** Rietveld fit of the powder X-ray diffraction pattern of  $\text{CaAl}_2$  oxidized by the following conditions: STA; heating rate:  $40 \text{ K min}^{-1}$ ; dwelling time: 0 h; gas flow:  $40 \text{ mL min}^{-1} \text{ Ar} : 40 \text{ mL min}^{-1} \text{ O}_2$ . The ticks indicate the Bragg positions for  $\text{Ca}_{12}\text{Al}_{14}\text{O}_{33}$  (orange),  $\text{CaAl}_2\text{O}_4$  (green),  $\text{Ca}_3\text{Al}_2\text{O}_6$  (purple), elemental Al (pink),  $\text{Al}_2\text{O}_3$  (cyan), CaO (olive).

| Refinement details for the data shown in Figure S8 |                                                              |                           |                                    |              |                         |              |
|----------------------------------------------------|--------------------------------------------------------------|---------------------------|------------------------------------|--------------|-------------------------|--------------|
| Source                                             | Bruker D8 ADVANCE (laboratory X-ray)                         |                           |                                    |              |                         |              |
| Temperature                                        | RT                                                           |                           |                                    |              |                         |              |
| Pressure                                           | ambient                                                      |                           |                                    |              |                         |              |
| Wavelengths                                        | Cu $K\alpha_1$ and Cu $K\alpha_2$ : 154.0596 and 154.4308 pm |                           |                                    |              |                         |              |
| Chemical formula                                   | $\text{Ca}_{12}\text{Al}_{14}\text{O}_{33}$                  | $\text{CaAl}_2\text{O}_4$ | $\text{Ca}_3\text{Al}_2\text{O}_6$ | Al           | $\text{Al}_2\text{O}_3$ | CaO          |
| Abbreviation                                       | C12A7                                                        | CA                        | C3A1                               | –            | –                       | –            |
| Space group                                        | $\bar{I}43d$                                                 | $P2_1/c$                  | $Pa\bar{3}$                        | $Fm\bar{3}m$ | $R\bar{3}c$             | $Fm\bar{3}m$ |
| $a / \text{pm}$                                    | 1197.92(1)                                                   | 874.8(12)                 | 1526.2(2)                          | 405.35(1)    | 475.90(6)               | 481.96(5)    |
| $b / \text{pm}$                                    | $a$                                                          | 809.9(4)                  | $a$                                | $a$          | $a$                     | $a$          |
| $c / \text{pm}$                                    | $a$                                                          | 1748(3)                   | $a$                                | $a$          | 1300.9(4)               | $a$          |
| $\beta / ^\circ$                                   | 90                                                           | 120.00(16)                | 90                                 | 90           | 90                      | 90           |
| $V / \text{nm}^3$                                  | 1.7190                                                       | 1.0720                    | 3.5552                             | 0.0666       | 0.2552                  | 0.1120       |
| $Z$                                                | 4                                                            | 12                        | 24                                 | 4            | 6                       | 4            |
| $d$ -space range                                   | 0.85-14.35 Å (6-130° $2\theta$ )                             |                           |                                    |              |                         |              |
| $\chi^2$                                           | 5.00                                                         |                           |                                    |              |                         |              |
| $R_p$                                              | 7.50                                                         |                           |                                    |              |                         |              |
| $R_{wp}$                                           | 10.06                                                        |                           |                                    |              |                         |              |
| Definition of $R$ factors                          | $R_p = \frac{\sum  w   I_0 - I_c ^2}{\sum  w I_0^2 }^{1/2}$  |                           |                                    |              |                         |              |

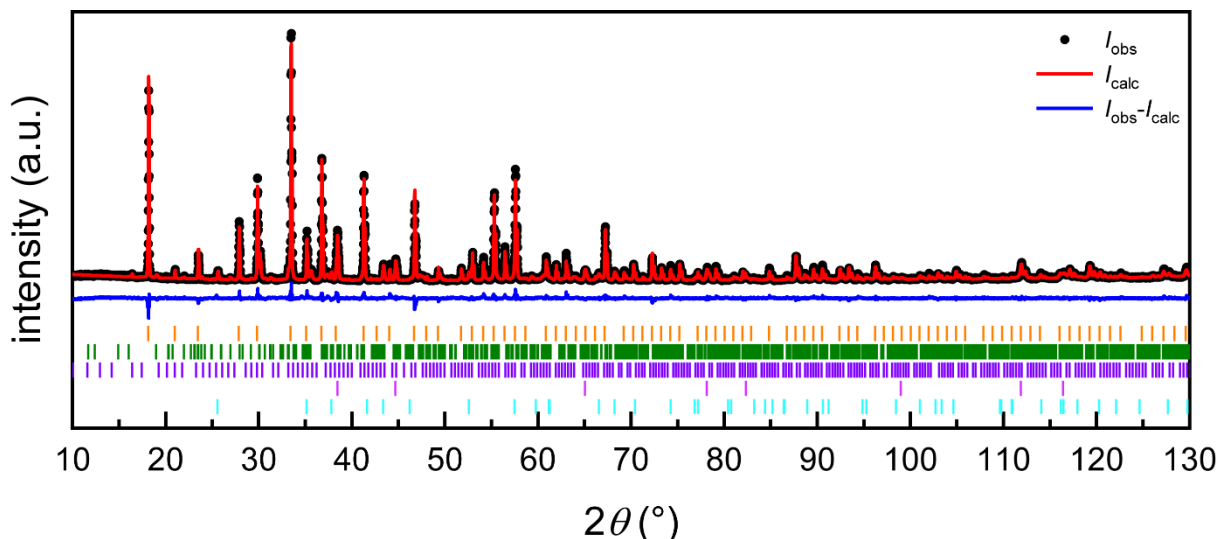

**Figure S9.** Rietveld fit of the powder X-ray diffraction pattern of  $\text{CaAl}_2$  oxidized by the following conditions: STA; heating rate:  $5 \text{ K min}^{-1}$ ; dwelling time: 5 h; gas flow:  $40 \text{ mL min}^{-1} \text{ Ar} : 40 \text{ mL min}^{-1} \text{ O}_2$ . The ticks indicate the Bragg positions for  $\text{Ca}_{12}\text{Al}_{14}\text{O}_{33}$  (orange),  $\text{CaAl}_2\text{O}_4$  (green),  $\text{Ca}_3\text{Al}_2\text{O}_6$  (purple), elemental Al (pink),  $\text{Al}_2\text{O}_3$  (cyan).

| Refinement details for the data shown in Figure S9 |                                                              |                           |                                    |              |                         |
|----------------------------------------------------|--------------------------------------------------------------|---------------------------|------------------------------------|--------------|-------------------------|
| Source                                             | Bruker D8 ADVANCE (laboratory X-ray)                         |                           |                                    |              |                         |
| Temperature                                        | RT                                                           |                           |                                    |              |                         |
| Pressure                                           | ambient                                                      |                           |                                    |              |                         |
| Wavelengths                                        | Cu $K\alpha_1$ and Cu $K\alpha_2$ : 154.0596 and 154.4308 pm |                           |                                    |              |                         |
| Chemical formula                                   | $\text{Ca}_{12}\text{Al}_{14}\text{O}_{33}$                  | $\text{CaAl}_2\text{O}_4$ | $\text{Ca}_3\text{Al}_2\text{O}_6$ | Al           | $\text{Al}_2\text{O}_3$ |
| Abbreviation                                       | C12A7                                                        | CA                        | C3A1                               | –            | –                       |
| Space group                                        | $I\bar{4}3d$                                                 | $P2_1/c$                  | $Pa\bar{3}$                        | $Fm\bar{3}m$ | $R\bar{3}c$             |
| $a / \text{pm}$                                    | 1197.72(1)                                                   | 874.49(15)                | 1526.69(12)                        | 405.43(1)    | 475.85(2)               |
| $b / \text{pm}$                                    | $a$                                                          | 809.09(9)                 | $a$                                | $a$          | $a$                     |
| $c / \text{pm}$                                    | $a$                                                          | 1743.6(2)                 | $a$                                | $a$          | 1299.77(10)             |
| $\beta / ^\circ$                                   | 90                                                           | 119.80(1)                 | 90                                 | 90           | 90                      |
| $V / \text{nm}^3$                                  | 1.7182                                                       | 1.0705                    | 3.5583                             | 0.0666       | 0.2550                  |
| $Z$                                                | 4                                                            | 12                        | 24                                 | 4            | 6                       |
| $d$ -space range                                   | 0.85–14.35 Å (6–130° $2\theta$ )                             |                           |                                    |              |                         |
| $\chi^2$                                           | 3.75                                                         |                           |                                    |              |                         |
| $R_p$                                              | 6.72                                                         |                           |                                    |              |                         |
| $R_{wp}$                                           | 8.79                                                         |                           |                                    |              |                         |
| Definition of $R$ factors                          | $R_p = \frac{\sum  w   I_0 - I_c ^2}{\sum  w  I_0^2}$        |                           |                                    |              |                         |

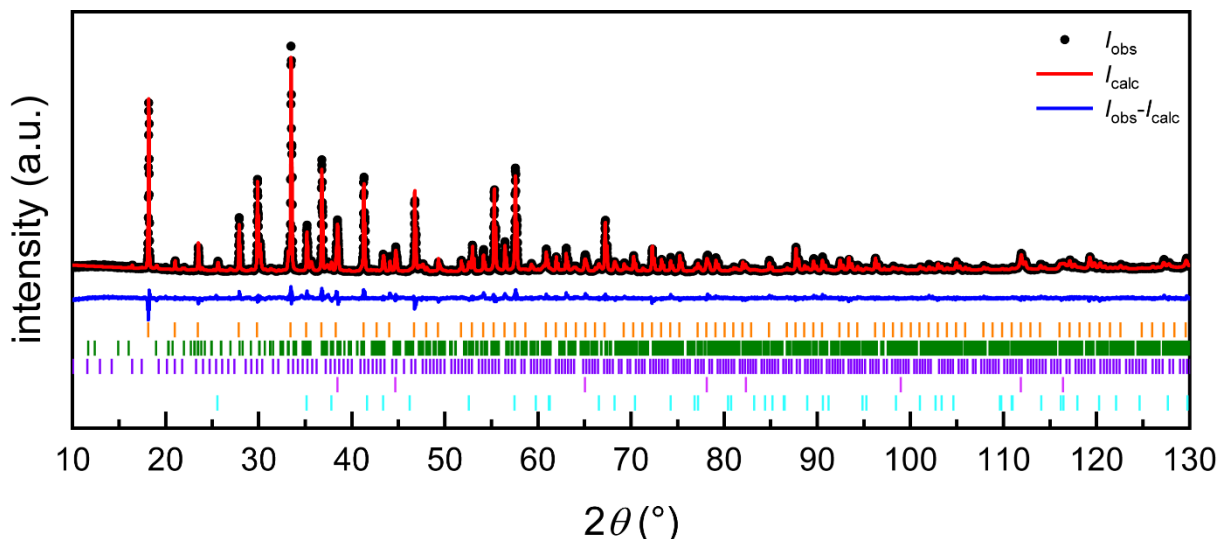

**Figure S10.** Rietveld fit of the powder X-ray diffraction pattern of  $\text{CaAl}_2$  oxidized by the following conditions: STA; heating rate:  $10 \text{ K min}^{-1}$ ; dwelling time: 5 h; gas flow:  $40 \text{ mL min}^{-1} \text{ Ar} : 40 \text{ mL min}^{-1} \text{ O}_2$ . The ticks indicate the Bragg positions for  $\text{Ca}_{12}\text{Al}_{14}\text{O}_{33}$  (orange),  $\text{CaAl}_2\text{O}_4$  (green),  $\text{Ca}_3\text{Al}_2\text{O}_6$  (purple), elemental Al (pink),  $\text{Al}_2\text{O}_3$  (cyan).

| Refinement details for the data shown in Figure S10 |                                                              |                           |                                    |              |                         |
|-----------------------------------------------------|--------------------------------------------------------------|---------------------------|------------------------------------|--------------|-------------------------|
| Source                                              | Bruker D8 ADVANCE (laboratory X-ray)                         |                           |                                    |              |                         |
| Temperature                                         | RT                                                           |                           |                                    |              |                         |
| Pressure                                            | ambient                                                      |                           |                                    |              |                         |
| Wavelengths                                         | Cu $K\alpha_1$ and Cu $K\alpha_2$ : 154.0596 and 154.4308 pm |                           |                                    |              |                         |
| Chemical formula                                    | $\text{Ca}_{12}\text{Al}_{14}\text{O}_{33}$                  | $\text{CaAl}_2\text{O}_4$ | $\text{Ca}_3\text{Al}_2\text{O}_6$ | Al           | $\text{Al}_2\text{O}_3$ |
| Abbreviation                                        | C12A7                                                        | CA                        | C3A1                               | –            | –                       |
| Space group                                         | $I\bar{4}3d$                                                 | $P2_1/c$                  | $Pa\bar{3}$                        | $Fm\bar{3}m$ | $R\bar{3}c$             |
| $a / \text{pm}$                                     | 1197.77(1)                                                   | 874.38(19)                | 1527.04(7)                         | 405.47(1)    | 475.99(2)               |
| $b / \text{pm}$                                     | $a$                                                          | 809.21(10)                | $a$                                | $a$          | $a$                     |
| $c / \text{pm}$                                     | $a$                                                          | 1743.9(3)                 | $a$                                | $a$          | 1299.72(9)              |
| $\beta / ^\circ$                                    | 90                                                           | 119.82(2)                 | 90                                 | 90           | 90                      |
| $V / \text{nm}^3$                                   | 1.7183                                                       | 1.0705                    | 3.5609                             | 0.0666       | 0.2550                  |
| $Z$                                                 | 4                                                            | 12                        | 24                                 | 4            | 6                       |
| $d$ -space range                                    | 0.85–14.35 Å (6–130° $2\theta$ )                             |                           |                                    |              |                         |
| $\chi^2$                                            | 3.91                                                         |                           |                                    |              |                         |
| $R_p$                                               | 6.85                                                         |                           |                                    |              |                         |
| $R_{wp}$                                            | 8.92                                                         |                           |                                    |              |                         |
| Definition of $R$ factors                           | $R_p = \frac{\sum  w   I_0 - I_c ^2}{\sum  w I_0^2 }$        |                           |                                    |              |                         |

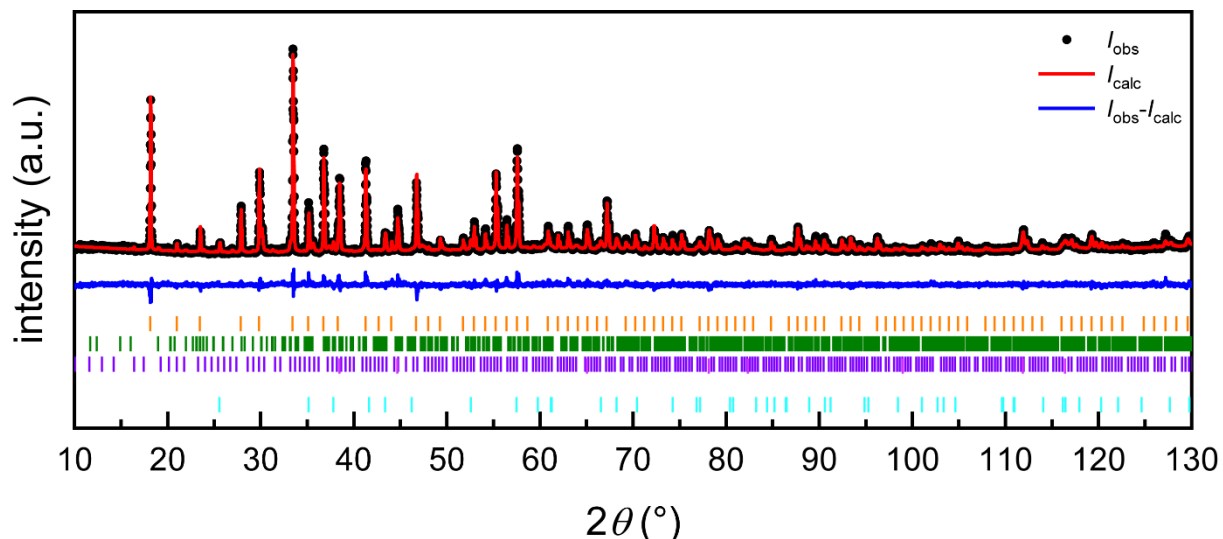

**Figure S11.** Rietveld fit of the powder X-ray diffraction pattern of  $\text{CaAl}_2$  oxidized by the following conditions: STA; heating rate:  $20 \text{ K min}^{-1}$ ; dwelling time: 5 h; gas flow:  $40 \text{ mL min}^{-1} \text{ Ar} : 40 \text{ mL min}^{-1} \text{ O}_2$ . The ticks indicate the Bragg positions for  $\text{Ca}_{12}\text{Al}_{14}\text{O}_{33}$  (orange),  $\text{CaAl}_2\text{O}_4$  (green),  $\text{Ca}_3\text{Al}_2\text{O}_6$  (purple), elemental Al (pink),  $\text{Al}_2\text{O}_3$  (cyan).

| Refinement details for the data shown in Figure S11 |                                                              |                           |                                    |              |                         |
|-----------------------------------------------------|--------------------------------------------------------------|---------------------------|------------------------------------|--------------|-------------------------|
| Source                                              | Bruker D8 ADVANCE (laboratory X-ray)                         |                           |                                    |              |                         |
| Temperature                                         | RT                                                           |                           |                                    |              |                         |
| Pressure                                            | ambient                                                      |                           |                                    |              |                         |
| Wavelengths                                         | Cu $K\alpha_1$ and Cu $K\alpha_2$ : 154.0596 and 154.4308 pm |                           |                                    |              |                         |
| Chemical formula                                    | $\text{Ca}_{12}\text{Al}_{14}\text{O}_{33}$                  | $\text{CaAl}_2\text{O}_4$ | $\text{Ca}_3\text{Al}_2\text{O}_6$ | Al           | $\text{Al}_2\text{O}_3$ |
| Abbreviation                                        | C12A7                                                        | CA                        | C3A1                               | –            | –                       |
| Space group                                         | $I\bar{4}3d$                                                 | $P2_1/c$                  | $Pa\bar{3}$                        | $Fm\bar{3}m$ | $R\bar{3}c$             |
| $a / \text{pm}$                                     | 1197.86(1)                                                   | 875.1(5)                  | 1527.1(3)                          | 405.35(1)    | 476.01(2)               |
| $b / \text{pm}$                                     | $a$                                                          | 809.49(17)                | $a$                                | $a$          | $a$                     |
| $c / \text{pm}$                                     | $a$                                                          | 1744.8(6)                 | $a$                                | $a$          | 1299.83(13)             |
| $\beta / ^\circ$                                    | 90                                                           | 199.92(6)                 | 90                                 | 90           | 90                      |
| $V / \text{nm}^3$                                   | 1.7188                                                       | 1.0713                    | 3.5610                             | 0.0666       | 0.2551                  |
| $Z$                                                 | 4                                                            | 12                        | 24                                 | 4            | 6                       |
| $d$ -space range                                    | 0.85–14.35 Å (6–130° $2\theta$ )                             |                           |                                    |              |                         |
| $\chi^2$                                            | 1.78                                                         |                           |                                    |              |                         |
| $R_p$                                               | 7.08                                                         |                           |                                    |              |                         |
| $R_{wp}$                                            | 8.99                                                         |                           |                                    |              |                         |
| Definition of $R$ factors                           | $R_p = \frac{\sum  w   I_0 - I_c ^2}{\sum  w  I_0^2}$        |                           |                                    |              |                         |

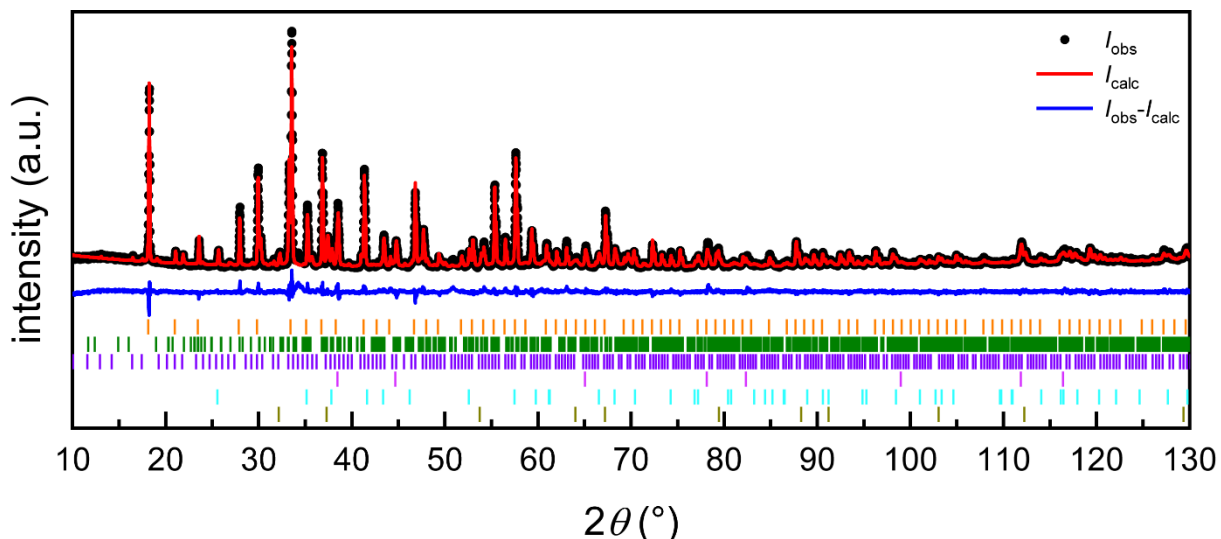

**Figure S12.** Rietveld fit of the powder X-ray diffraction pattern of  $\text{CaAl}_2$  oxidized by the following conditions: STA; heating rate:  $40 \text{ K min}^{-1}$ ; dwelling time: 5 h; gas flow:  $40 \text{ mL min}^{-1} \text{ Ar} : 40 \text{ mL min}^{-1} \text{ O}_2$ . The ticks indicate the Bragg positions for  $\text{Ca}_{12}\text{Al}_{14}\text{O}_{33}$  (orange),  $\text{CaAl}_2\text{O}_4$  (green),  $\text{Ca}_3\text{Al}_2\text{O}_6$  (purple), elemental Al (pink),  $\text{Al}_2\text{O}_3$  (cyan), CaO (olive).

| Refinement details for the data shown in Figure S12 |                                                              |                           |                                    |              |                         |              |
|-----------------------------------------------------|--------------------------------------------------------------|---------------------------|------------------------------------|--------------|-------------------------|--------------|
| Source                                              | Bruker D8 ADVANCE (laboratory X-ray)                         |                           |                                    |              |                         |              |
| Temperature                                         | RT                                                           |                           |                                    |              |                         |              |
| Pressure                                            | ambient                                                      |                           |                                    |              |                         |              |
| Wavelengths                                         | Cu $K\alpha_1$ and Cu $K\alpha_2$ : 154.0596 and 154.4308 pm |                           |                                    |              |                         |              |
| Chemical formula                                    | $\text{Ca}_{12}\text{Al}_{14}\text{O}_{33}$                  | $\text{CaAl}_2\text{O}_4$ | $\text{Ca}_3\text{Al}_2\text{O}_6$ | Al           | $\text{Al}_2\text{O}_3$ | CaO          |
| Abbreviation                                        | C12A7                                                        | CA                        | C3A1                               | –            | –                       | –            |
| Space group                                         | $I\bar{4}3d$                                                 | $P2_1/c$                  | $Pa\bar{3}$                        | $Fm\bar{3}m$ | $R\bar{3}c$             | $Fm\bar{3}m$ |
| $a / \text{pm}$                                     | 1197.84(1)                                                   | 876.4(2)                  | 1527.13(3)                         | 405.43(1)    | 476.05(2)               | 481.41(3)    |
| $b / \text{pm}$                                     | $a$                                                          | 808.89(16)                | $a$                                | $a$          | $a$                     | $a$          |
| $c / \text{pm}$                                     | $a$                                                          | 1744.1(4)                 | $a$                                | $a$          | 1299.89(9)              | $a$          |
| $\beta / ^\circ$                                    | 90                                                           | 119.97(3)                 | 90                                 | 90           | 90                      | 90           |
| $V / \text{nm}^3$                                   | 1.7187                                                       | 1.0711                    | 3.5615                             | 0.0666       | 0.2551                  | 0.1116       |
| $Z$                                                 | 4                                                            | 12                        | 24                                 | 4            | 6                       | 4            |
| $d$ -space range                                    | 0.85–14.35 Å (6–130° $2\theta$ )                             |                           |                                    |              |                         |              |
| $\chi^2$                                            | 3.85                                                         |                           |                                    |              |                         |              |
| $R_p$                                               | 7.01                                                         |                           |                                    |              |                         |              |
| $R_{wp}$                                            | 9.42                                                         |                           |                                    |              |                         |              |
| Definition of $R$ factors                           | $R_p = \frac{\sum  w   I_0 - I_c ^2}{\sum  w I_0^2 }$        |                           |                                    |              |                         |              |

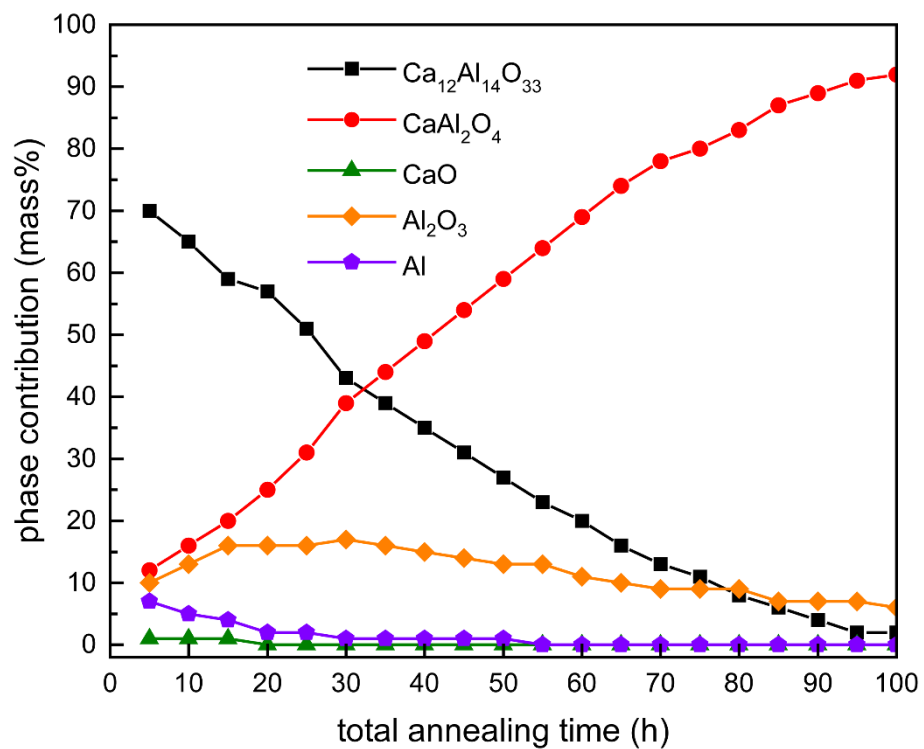

**Figure S13.** Results of the Rietveld refinements of the oxidation approach of  $\text{CaAl}_2$  with repeated heating to 1273 K for 5 h each followed by grinding.

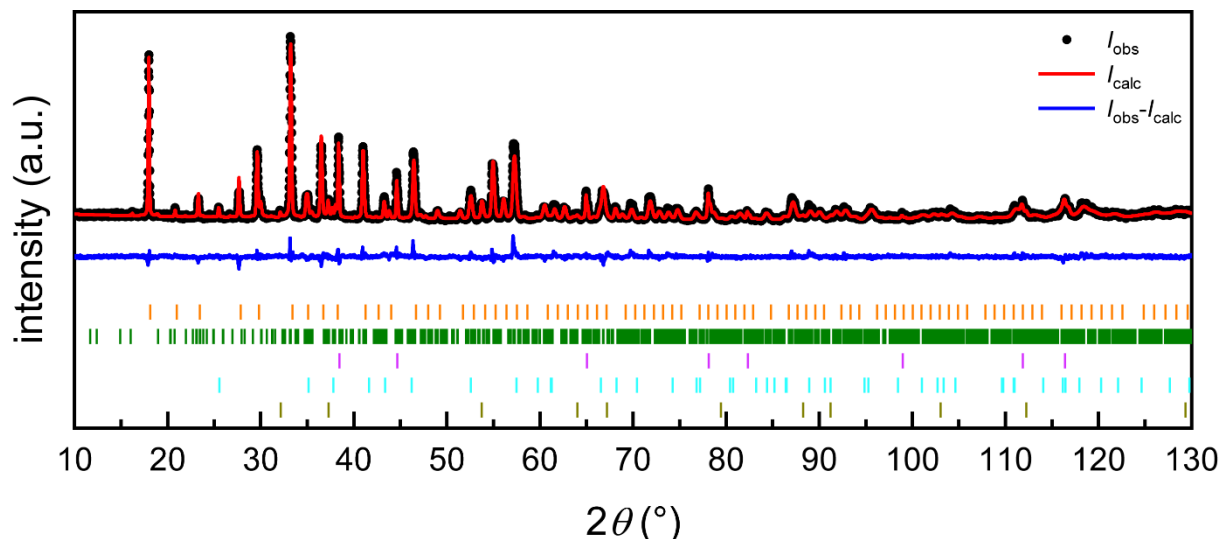

**Figure S14.** Rietveld fit of the powder X-ray diffraction pattern of  $\text{CaAl}_2$  oxidized by the following conditions: muffle furnace; heating rate:  $15 \text{ K min}^{-1}$ ; dwelling time: 1 h; air. The ticks indicate the Bragg positions for  $\text{Ca}_{12}\text{Al}_{14}\text{O}_{33}$  (orange),  $\text{CaAl}_2\text{O}_4$  (green),  $\text{Ca}_3\text{Al}_2\text{O}_6$  (purple), elemental Al (pink),  $\text{Al}_2\text{O}_3$  (cyan), CaO (olive).

| Refinement details for the data shown in Figure S14 |                                                              |                           |              |                         |              |
|-----------------------------------------------------|--------------------------------------------------------------|---------------------------|--------------|-------------------------|--------------|
| Source                                              | Bruker D8 ADVANCE (laboratory X-ray)                         |                           |              |                         |              |
| Temperature                                         | RT                                                           |                           |              |                         |              |
| Pressure                                            | ambient                                                      |                           |              |                         |              |
| Wavelengths                                         | Cu $K\alpha_1$ and Cu $K\alpha_2$ : 154.0596 and 154.4308 pm |                           |              |                         |              |
| Chemical formula                                    | $\text{Ca}_{12}\text{Al}_{14}\text{O}_{33}$                  | $\text{CaAl}_2\text{O}_4$ | Al           | $\text{Al}_2\text{O}_3$ | CaO          |
| Abbreviation                                        | C12A7                                                        | CA                        | –            | –                       | –            |
| Space group                                         | $I\bar{4}3d$                                                 | $P2_1/c$                  | $Fm\bar{3}m$ | $R\bar{3}c$             | $Fm\bar{3}m$ |
| $a / \text{pm}$                                     | 1203.25(2)                                                   | 877.6(6)                  | 405.40(1)    | 476.32(3)               | 481.71(4)    |
| $b / \text{pm}$                                     | $a$                                                          | 809.0(3)                  | $a$          | $a$                     | $a$          |
| $c / \text{pm}$                                     | $a$                                                          | 1747.3(11)                | $a$          | 1300.48(16)             | $a$          |
| $\beta / ^\circ$                                    | 90                                                           | 120.00(8)                 | 90           | 90                      | 90           |
| $V / \text{nm}^3$                                   | 1.7421                                                       | 1.0743                    | 0.0666       | 0.2555                  | 0.1118       |
| $Z$                                                 | 4                                                            | 12                        | 4            | 6                       | 4            |
| $d$ -space range                                    | 0.85–14.35 Å (6–130° $2\theta$ )                             |                           |              |                         |              |
| $\chi^2$                                            | 3.85                                                         |                           |              |                         |              |
| $R_p$                                               | 8.73                                                         |                           |              |                         |              |
| $R_{wp}$                                            | 11.12                                                        |                           |              |                         |              |
| Definition of $R$ factors                           | $R_p = \frac{\sum  w   I_0 - I_c ^2}{\sum  w  I_0^2}$        |                           |              |                         |              |



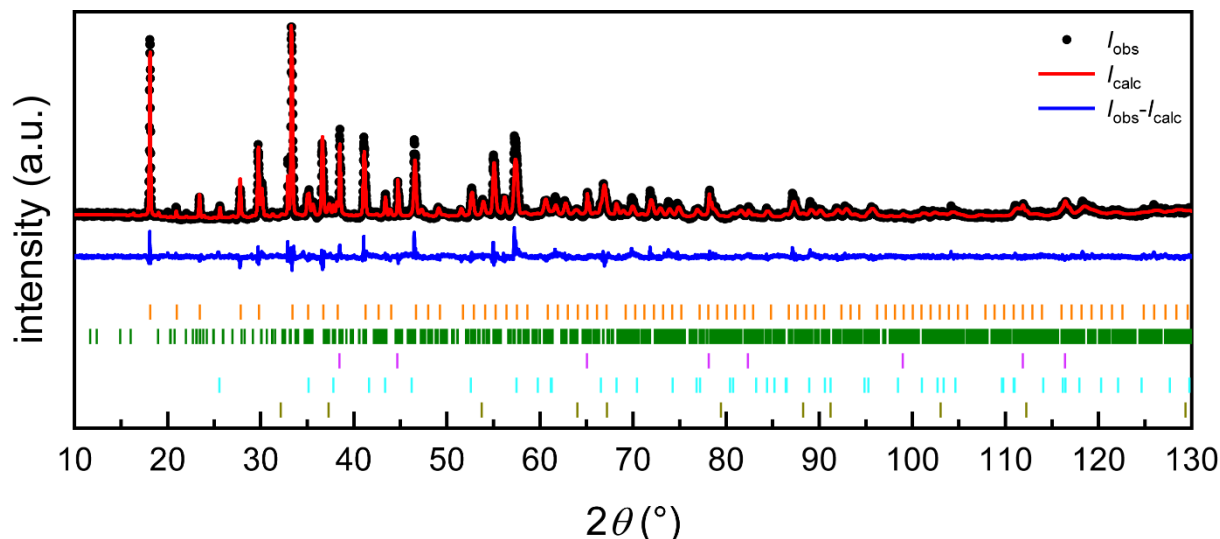

**Figure S15.** Rietveld fit of the powder X-ray diffraction pattern of  $\text{CaAl}_2$  oxidized by the following conditions: muffle furnace; heating rate:  $15 \text{ K min}^{-1}$ ; dwelling time: 5 h; air. The ticks indicate the Bragg positions for  $\text{Ca}_{12}\text{Al}_{14}\text{O}_{33}$  (orange),  $\text{CaAl}_2\text{O}_4$  (green), elemental Al (pink),  $\text{Al}_2\text{O}_3$  (cyan), CaO (olive).

| Refinement details for the data shown in Figure S15 |                                                                                                                                             |                           |              |                         |              |
|-----------------------------------------------------|---------------------------------------------------------------------------------------------------------------------------------------------|---------------------------|--------------|-------------------------|--------------|
| Source                                              | Bruker D8 ADVANCE (laboratory X-ray)                                                                                                        |                           |              |                         |              |
| Temperature                                         | RT                                                                                                                                          |                           |              |                         |              |
| Pressure                                            | ambient                                                                                                                                     |                           |              |                         |              |
| Wavelengths                                         | Cu $K\alpha_1$ and Cu $K\alpha_2$ : 154.0596 and 154.4308 pm                                                                                |                           |              |                         |              |
| Chemical formula                                    | $\text{Ca}_{12}\text{Al}_{14}\text{O}_{33}$                                                                                                 | $\text{CaAl}_2\text{O}_4$ | Al           | $\text{Al}_2\text{O}_3$ | CaO          |
| Abbreviation                                        | C12A7                                                                                                                                       | CA                        | –            | –                       | –            |
| Space group                                         | $I\bar{4}3d$                                                                                                                                | $P2_1/c$                  | $Fm\bar{3}m$ | $R\bar{3}c$             | $Fm\bar{3}m$ |
| $a$ / pm                                            | 1203.13(3)                                                                                                                                  | 876.2(5)                  | 405.29(1)    | 476.25(3)               | 481.71(15)   |
| $b$ / pm                                            | $a$                                                                                                                                         | 809.35(18)                | $a$          | $a$                     | $a$          |
| $c$ / pm                                            | $a$                                                                                                                                         | 1745.9(8)                 | $a$          | 1299.42(17)             | $a$          |
| $\beta$ / °                                         | 90                                                                                                                                          | 119.93(17)                | 90           | 90                      | 90           |
| $V$ / $\text{nm}^3$                                 | 1.7416                                                                                                                                      | 1.0730                    | 0.0666       | 0.2552                  | 0.1118       |
| $Z$                                                 | 4                                                                                                                                           | 12                        | 4            | 6                       | 4            |
| $d$ -space range                                    | 0.85-14.35 Å (6-130° $2\theta$ )                                                                                                            |                           |              |                         |              |
| $\chi^2$                                            | 2.97                                                                                                                                        |                           |              |                         |              |
| $R_p$                                               | 9.15                                                                                                                                        |                           |              |                         |              |
| $R_{wp}$                                            | 11.77                                                                                                                                       |                           |              |                         |              |
| Definition of $R$ factors                           | $R_p = \frac{\sum  w   I_0 - I_c ^2}{\sum  w  I_0^2}$ $R_{wp} = \left( \frac{\sum  w   I_0 - I_c ^2}{\sum  w  I_0^2} \right)^{\frac{1}{2}}$ |                           |              |                         |              |

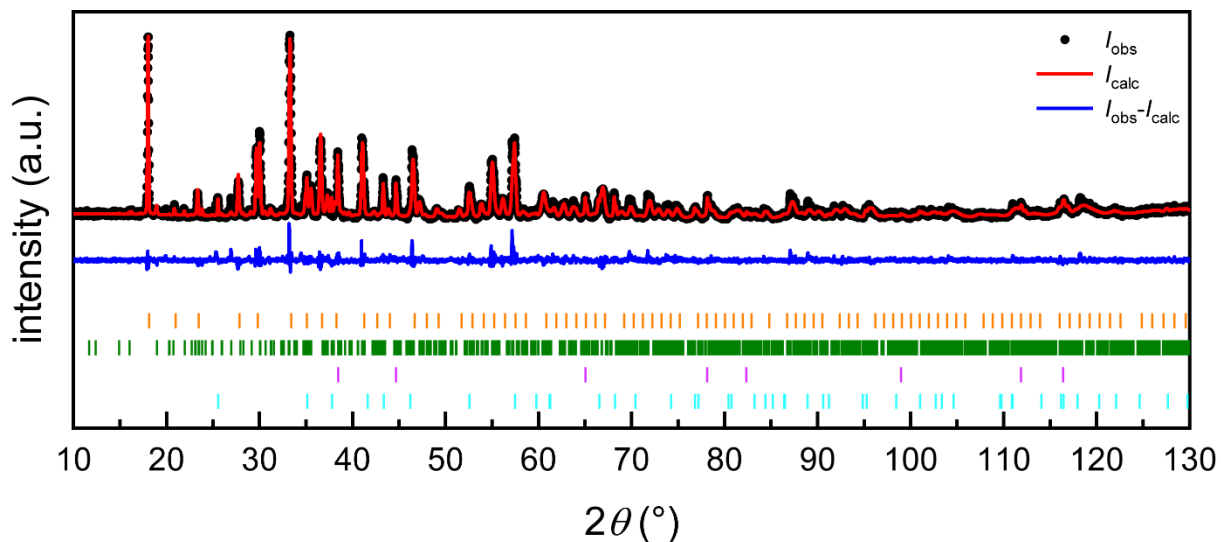

**Figure S16.** Rietveld fit of the powder X-ray diffraction pattern of  $\text{CaAl}_2$  oxidized by the following conditions: muffle furnace; heating rate:  $15 \text{ K min}^{-1}$ ; dwelling time: 48 h; air. The ticks indicate the Bragg positions for  $\text{Ca}_{12}\text{Al}_{14}\text{O}_{33}$  (orange),  $\text{CaAl}_2\text{O}_4$  (green), elemental Al (pink),  $\text{Al}_2\text{O}_3$  (cyan).

| Refinement details for the data shown in Figure S16 |                                                              |                           |              |                         |
|-----------------------------------------------------|--------------------------------------------------------------|---------------------------|--------------|-------------------------|
| Source                                              | Bruker D8 ADVANCE (laboratory X-ray)                         |                           |              |                         |
| Temperature                                         | RT                                                           |                           |              |                         |
| Pressure                                            | ambient                                                      |                           |              |                         |
| Wavelengths                                         | Cu $K\alpha_1$ and Cu $K\alpha_2$ : 154.0596 and 154.4308 pm |                           |              |                         |
| Chemical formula                                    | $\text{Ca}_{12}\text{Al}_{14}\text{O}_{33}$                  | $\text{CaAl}_2\text{O}_4$ | Al           | $\text{Al}_2\text{O}_3$ |
| Abbreviation                                        | C12A7                                                        | CA                        | –            | –                       |
| Space group                                         | $I\bar{4}3d$                                                 | $P2_1/c$                  | $Fm\bar{3}m$ | $R\bar{3}c$             |
| $a$ / pm                                            | 1201.92(3)                                                   | 875.02(13)                | 405.19(1)    | 476.08(2)               |
| $b$ / pm                                            | $a$                                                          | 809.69(9)                 | $a$          | $a$                     |
| $c$ / pm                                            | $a$                                                          | 1744.4(2)                 | $a$          | 1299.84(10)             |
| $\beta$ / °                                         | 90                                                           | 119.76(1)                 | 90           | 90                      |
| $V$ / $\text{nm}^3$                                 | 1.7363                                                       | 1.0729                    | 0.0665       | 0.2551                  |
| $Z$                                                 | 4                                                            | 12                        | 4            | 6                       |
| $d$ -space range                                    | 0.85–14.35 Å (6–130° $2\theta$ )                             |                           |              |                         |
| $\chi^2$                                            | 2.92                                                         |                           |              |                         |
| $R_p$                                               | 8.57                                                         |                           |              |                         |
| $R_{wp}$                                            | 11.12                                                        |                           |              |                         |
| Definition of $R$ factors                           | $R_p = \frac{\sum  w   I_0 - I_c ^2}{\sum  w  I_0^2}$        |                           |              |                         |

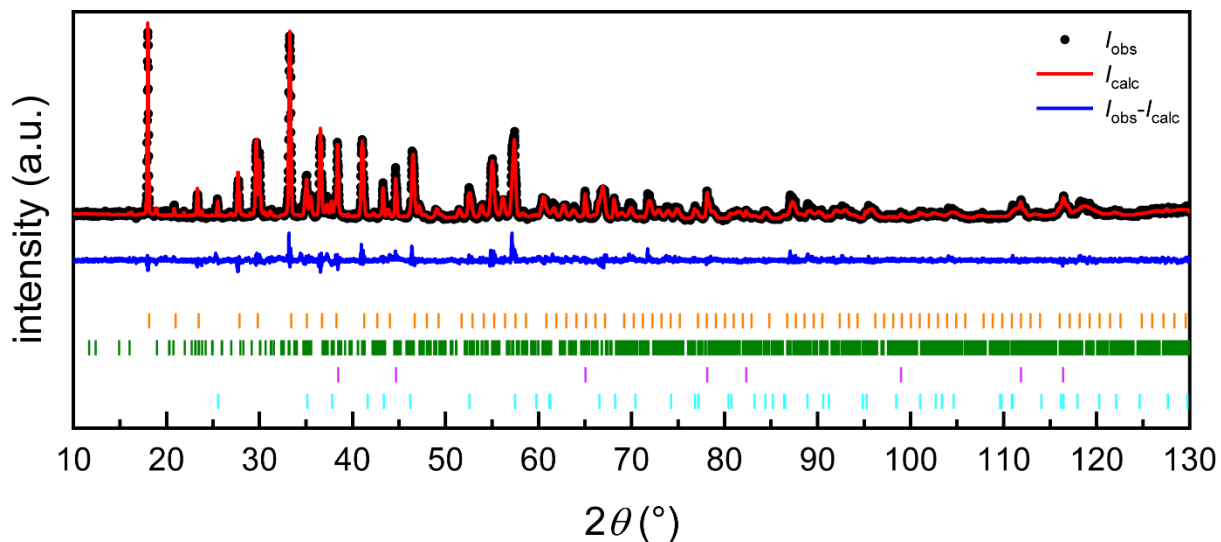

**Figure S17.** Rietveld fit of the powder X-ray diffraction pattern of  $\text{CaAl}_2$  oxidized by the following conditions: muffle furnace; heating rate:  $15 \text{ K min}^{-1}$ ; dwelling time: 96 h; air. The ticks indicate the Bragg positions for  $\text{Ca}_{12}\text{Al}_{14}\text{O}_{33}$  (orange),  $\text{CaAl}_2\text{O}_4$  (green), elemental Al (pink),  $\text{Al}_2\text{O}_3$  (cyan).

| Refinement details for the data shown in Figure S17 |                                                              |                           |              |                         |
|-----------------------------------------------------|--------------------------------------------------------------|---------------------------|--------------|-------------------------|
| Source                                              | Bruker D8 ADVANCE (laboratory X-ray)                         |                           |              |                         |
| Temperature                                         | RT                                                           |                           |              |                         |
| Pressure                                            | ambient                                                      |                           |              |                         |
| Wavelengths                                         | Cu $K\alpha_1$ and Cu $K\alpha_2$ : 154.0596 and 154.4308 pm |                           |              |                         |
| Chemical formula                                    | $\text{Ca}_{12}\text{Al}_{14}\text{O}_{33}$                  | $\text{CaAl}_2\text{O}_4$ | Al           | $\text{Al}_2\text{O}_3$ |
| Abbreviation                                        | C12A7                                                        | CA                        | –            | –                       |
| Space group                                         | $I\bar{4}3d$                                                 | $P2_1/c$                  | $Fm\bar{3}m$ | $R\bar{3}c$             |
| $a / \text{pm}$                                     | 1202.26(3)                                                   | 875.20(15)                | 405.13(1)    | 476.12(2)               |
| $b / \text{pm}$                                     | $a$                                                          | 809.60(8)                 | $a$          | $a$                     |
| $c / \text{pm}$                                     | $a$                                                          | 1743.86(17)               | $a$          | 1299.74(9)              |
| $\beta / ^\circ$                                    | 90                                                           | 119.77(2)                 | 90           | 90                      |
| $V / \text{nm}^3$                                   | 1.7378                                                       | 1.0726                    | 0.0665       | 0.2552                  |
| $Z$                                                 | 4                                                            | 12                        | 4            | 6                       |
| $d$ -space range                                    | 0.85–14.35 Å (6–130° $2\theta$ )                             |                           |              |                         |
| $\chi^2$                                            | 3.10                                                         |                           |              |                         |
| $R_p$                                               | 8.47                                                         |                           |              |                         |
| $R_{wp}$                                            | 11.22                                                        |                           |              |                         |
| Definition of $R$ factors                           | $R_p = \frac{\sum  w   I_0 - I_c ^2}{\sum  w  I_0^2}$        |                           |              |                         |

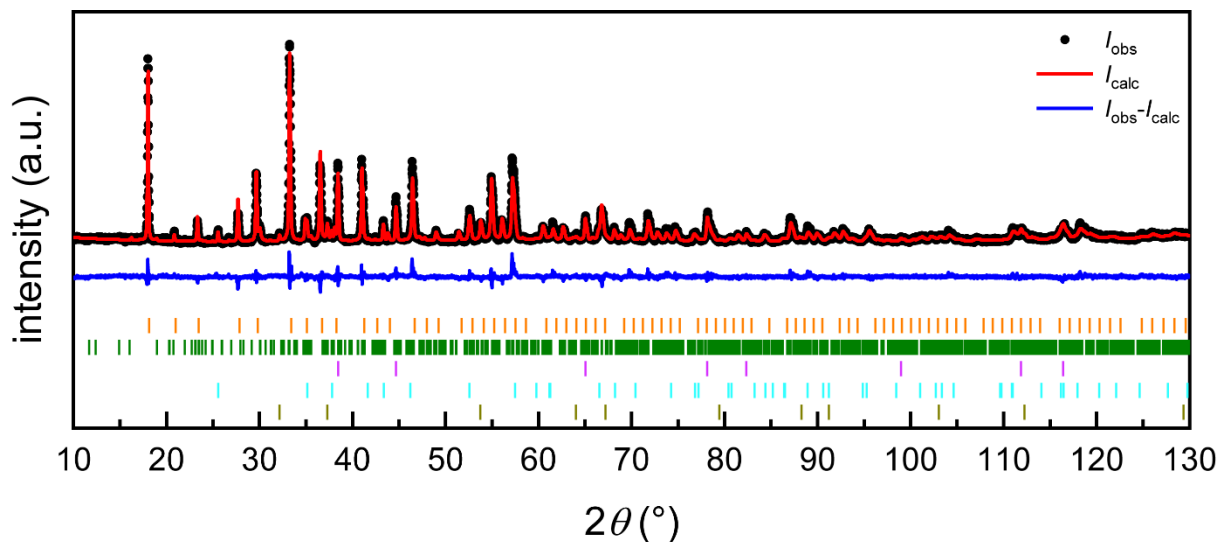

**Figure S18.** Rietveld fit of the powder X-ray diffraction pattern of  $\text{CaAl}_2$  oxidized by the following conditions: muffle furnace; heating rate:  $15 \text{ K min}^{-1}$ ; dwelling time: 1 h; total dwelling time: 1 h; air. The ticks indicate the Bragg positions for  $\text{Ca}_{12}\text{Al}_{14}\text{O}_{33}$  (orange),  $\text{CaAl}_2\text{O}_4$  (green), elemental Al (pink),  $\text{Al}_2\text{O}_3$  (cyan), CaO (olive).

| Refinement details for the data shown in Figure S18 |                                                              |                           |              |                         |              |
|-----------------------------------------------------|--------------------------------------------------------------|---------------------------|--------------|-------------------------|--------------|
| Source                                              | Bruker D8 ADVANCE (laboratory X-ray)                         |                           |              |                         |              |
| Temperature                                         | RT                                                           |                           |              |                         |              |
| Pressure                                            | ambient                                                      |                           |              |                         |              |
| Wavelengths                                         | Cu $K\alpha_1$ and Cu $K\alpha_2$ : 154.0596 and 154.4308 pm |                           |              |                         |              |
| Chemical formula                                    | $\text{Ca}_{12}\text{Al}_{14}\text{O}_{33}$                  | $\text{CaAl}_2\text{O}_4$ | Al           | $\text{Al}_2\text{O}_3$ | CaO          |
| Abbreviation                                        | C12A7                                                        | CA                        | –            | –                       | –            |
| Space group                                         | $\bar{I}43d$                                                 | $P2_1/c$                  | $Fm\bar{3}m$ | $R\bar{3}c$             | $Fm\bar{3}m$ |
| $a$ / pm                                            | 1203.72(2)                                                   | 877.5(4)                  | 405.20(1)    | 475.24(3)               | 481.61(4)    |
| $b$ / pm                                            | $a$                                                          | 808.5(4)                  | $a$          | $a$                     | $a$          |
| $c$ / pm                                            | $a$                                                          | 1749(2)                   | $a$          | 1300.15(16)             | $a$          |
| $\beta$ / °                                         | 90                                                           | 120.00(17)                | 90           | 90                      | 90           |
| $V$ / $\text{nm}^3$                                 | 1.7441                                                       | 1.0750                    | 0.0665       | 0.2554                  | 0.1117       |
| $Z$                                                 | 4                                                            | 12                        | 4            | 6                       | 4            |
| $d$ -space range                                    | 0.85–14.35 Å (6–130° $2\theta$ )                             |                           |              |                         |              |
| $\chi^2$                                            | 2.97                                                         |                           |              |                         |              |
| $R_p$                                               | 8.30                                                         |                           |              |                         |              |
| $R_{wp}$                                            | 10.59                                                        |                           |              |                         |              |
| Definition of $R$ factors                           | $R_p = \frac{\sum  w   I_o - I_c ^2}{\sum  w  I_o^2}^{1/2}$  |                           |              |                         |              |

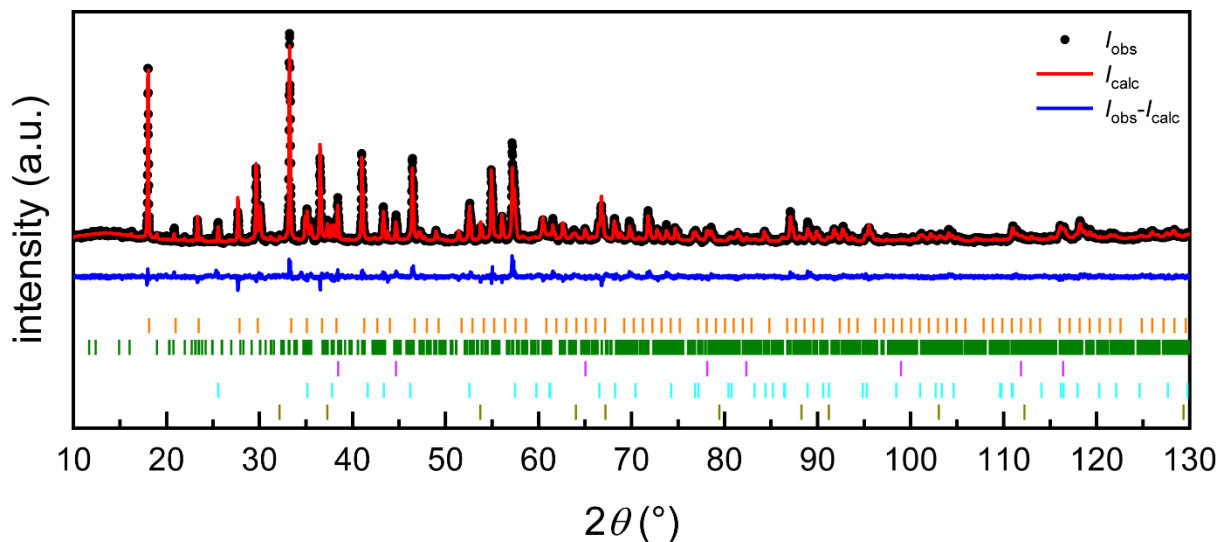

**Figure S19.** Rietveld fit of the powder X-ray diffraction pattern of  $\text{CaAl}_2$  oxidized by the following conditions: muffle furnace; heating rate:  $15 \text{ K min}^{-1}$ ; dwelling time: 1 h; total dwelling time: 2 h; air. The ticks indicate the Bragg positions for  $\text{Ca}_{12}\text{Al}_{14}\text{O}_{33}$  (orange),  $\text{CaAl}_2\text{O}_4$  (green), elemental Al (pink),  $\text{Al}_2\text{O}_3$  (cyan), CaO (olive).

| Refinement details for the data shown in Figure S19 |                                                              |                           |              |                         |              |
|-----------------------------------------------------|--------------------------------------------------------------|---------------------------|--------------|-------------------------|--------------|
| Source                                              | Bruker D8 ADVANCE (laboratory X-ray)                         |                           |              |                         |              |
| Temperature                                         | RT                                                           |                           |              |                         |              |
| Pressure                                            | ambient                                                      |                           |              |                         |              |
| Wavelengths                                         | Cu $K\alpha_1$ and Cu $K\alpha_2$ : 154.0596 and 154.4308 pm |                           |              |                         |              |
| Chemical formula                                    | $\text{Ca}_{12}\text{Al}_{14}\text{O}_{33}$                  | $\text{CaAl}_2\text{O}_4$ | Al           | $\text{Al}_2\text{O}_3$ | CaO          |
| Abbreviation                                        | C12A7                                                        | CA                        | –            | –                       | –            |
| Space group                                         | $I\bar{4}3d$                                                 | $P2_1/c$                  | $Fm\bar{3}m$ | $R\bar{3}c$             | $Fm\bar{3}m$ |
| $a$ / pm                                            | 1204.10(2)                                                   | 876.1(3)                  | 405.38(1)    | 476.13(2)               | 481.50(7)    |
| $b$ / pm                                            | $a$                                                          | 809.22(14)                | $a$          | $a$                     | $a$          |
| $c$ / pm                                            | $a$                                                          | 1746.8(6)                 | $a$          | 1299.98(9)              | $a$          |
| $\beta$ / °                                         | 90                                                           | 119.98(5)                 | 90           | 90                      | 90           |
| $V$ / $\text{nm}^3$                                 | 1.7458                                                       | 1.0728                    | 0.0666       | 0.2552                  | 0.1116       |
| $Z$                                                 | 4                                                            | 12                        | 4            | 6                       | 4            |
| $d$ -space range                                    | 0.85-14.35 Å (6-130° $2\theta$ )                             |                           |              |                         |              |
| $\chi^2$                                            | 3.12                                                         |                           |              |                         |              |
| $R_p$                                               | 8.43                                                         |                           |              |                         |              |
| $R_{wp}$                                            | 6.08                                                         |                           |              |                         |              |
| Definition of $R$ factors                           | $R_p = \frac{\sum  w   I_0 - I_c ^2}{\sum  w  I_0^2}$        |                           |              |                         |              |

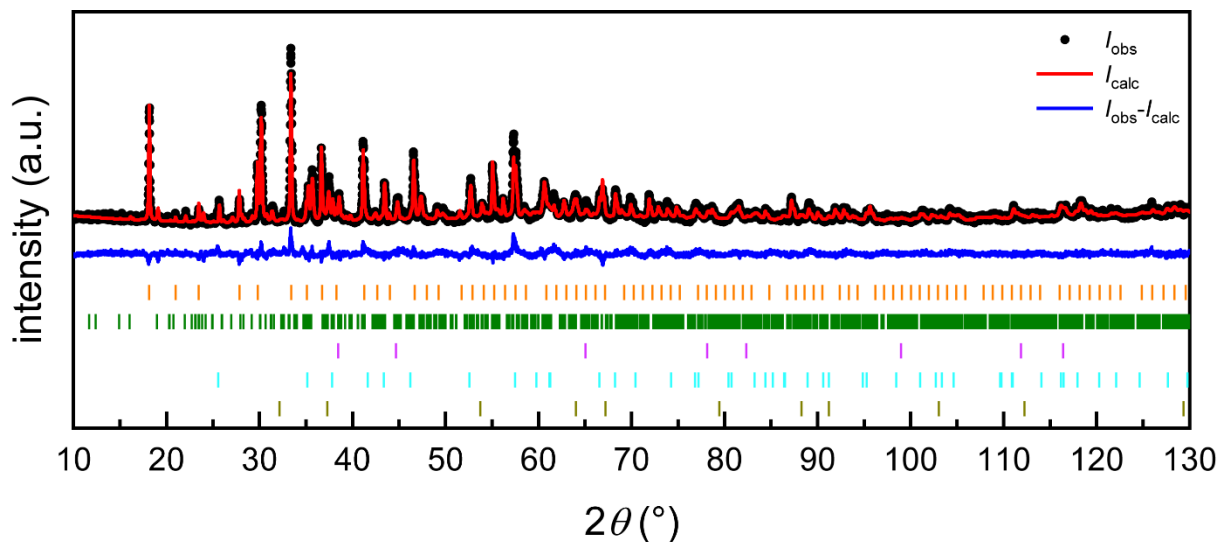

**Figure S20.** Rietveld fit of the powder X-ray diffraction pattern of  $\text{CaAl}_2$  oxidized by the following conditions: muffle furnace; heating rate:  $15 \text{ K min}^{-1}$ ; dwelling time: 5 h; total dwelling time: 7 h; air. The ticks indicate the Bragg positions for  $\text{Ca}_{12}\text{Al}_{14}\text{O}_{33}$  (orange),  $\text{CaAl}_2\text{O}_4$  (green), elemental Al (pink),  $\text{Al}_2\text{O}_3$  (cyan), CaO (olive).

| Refinement details for the data shown in Figure S20 |                                                                                                                                              |                           |              |                         |              |
|-----------------------------------------------------|----------------------------------------------------------------------------------------------------------------------------------------------|---------------------------|--------------|-------------------------|--------------|
| Source                                              | Bruker D8 ADVANCE (laboratory X-ray)                                                                                                         |                           |              |                         |              |
| Temperature                                         | RT                                                                                                                                           |                           |              |                         |              |
| Pressure                                            | ambient                                                                                                                                      |                           |              |                         |              |
| Wavelengths                                         | Cu $K\alpha_1$ and Cu $K\alpha_2$ : 154.0596 and 154.4308 pm                                                                                 |                           |              |                         |              |
| Chemical formula                                    | $\text{Ca}_{12}\text{Al}_{14}\text{O}_{33}$                                                                                                  | $\text{CaAl}_2\text{O}_4$ | Al           | $\text{Al}_2\text{O}_3$ | CaO          |
| Abbreviation                                        | C12A7                                                                                                                                        | CA                        | –            | –                       | –            |
| Space group                                         | $\bar{I}43d$                                                                                                                                 | $P2_1/c$                  | $Fm\bar{3}m$ | $R\bar{3}c$             | $Fm\bar{3}m$ |
| $a$ / pm                                            | 1203.96(3)                                                                                                                                   | 874.57(12)                | 405.46(4)    | 476.11(2)               | 482.4(3)     |
| $b$ / pm                                            | $a$                                                                                                                                          | 809.64(7)                 | $a$          | $a$                     | $a$          |
| $c$ / pm                                            | $a$                                                                                                                                          | 1744.39(18)               | $a$          | 1299.91(11)             | $a$          |
| $\beta$ / °                                         | 90                                                                                                                                           | 119.791(11)               | 90           | 90                      | 90           |
| $V$ / $\text{nm}^3$                                 | 1.74515(11)                                                                                                                                  | 1.0719(2)                 | 0.066656(18) | 0.25519(3)              | 0.1122(2)    |
| $Z$                                                 | 4                                                                                                                                            | 12                        | 4            | 6                       | 4            |
| $d$ -space range                                    | 0.85–14.35 Å (6–130° $2\theta$ )                                                                                                             |                           |              |                         |              |
| $\chi^2$                                            | 2.80                                                                                                                                         |                           |              |                         |              |
| $R_p$                                               | 8.82                                                                                                                                         |                           |              |                         |              |
| $R_{wp}$                                            | 11.27                                                                                                                                        |                           |              |                         |              |
| Definition of $R$ factors                           | $R_p = \frac{\sum  w   I_o - I_c ^2}{\sum  w  I_o^2};$ $R_{wp} = \left( \frac{\sum  w   I_o - I_c ^2}{\sum  w  I_o^2} \right)^{\frac{1}{2}}$ |                           |              |                         |              |

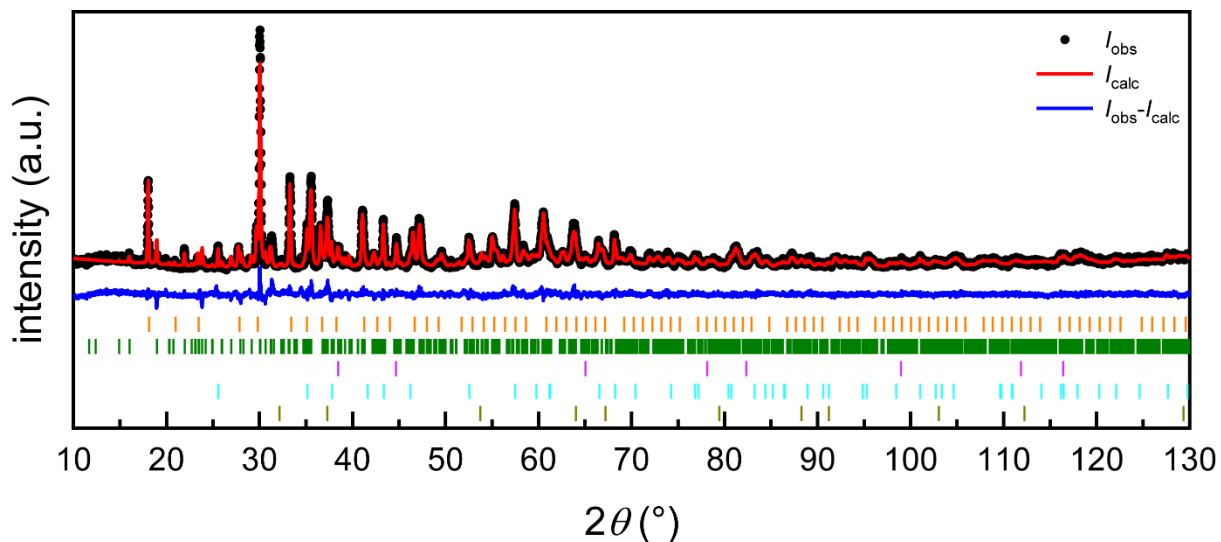

**Figure S21.** Rietveld fit of the powder X-ray diffraction pattern of  $\text{CaAl}_2$  oxidized by the following conditions: muffle furnace; heating rate:  $15 \text{ K min}^{-1}$ ; dwelling time: 10 h; total dwelling time: 17 h; air. The ticks indicate the Bragg positions for  $\text{Ca}_{12}\text{Al}_{14}\text{O}_{33}$  (orange),  $\text{CaAl}_2\text{O}_4$  (green), elemental Al (pink),  $\text{Al}_2\text{O}_3$  (cyan), CaO (olive).

| Refinement details for the data shown in Figure S21 |                                                                                                                                              |                           |              |                         |              |
|-----------------------------------------------------|----------------------------------------------------------------------------------------------------------------------------------------------|---------------------------|--------------|-------------------------|--------------|
| Source                                              | Bruker D8 ADVANCE (laboratory X-ray)                                                                                                         |                           |              |                         |              |
| Temperature                                         | RT                                                                                                                                           |                           |              |                         |              |
| Pressure                                            | ambient                                                                                                                                      |                           |              |                         |              |
| Wavelengths                                         | Cu $K\alpha_1$ and Cu $K\alpha_2$ : 154.0596 and 154.4308 pm                                                                                 |                           |              |                         |              |
| Chemical formula                                    | $\text{Ca}_{12}\text{Al}_{14}\text{O}_{33}$                                                                                                  | $\text{CaAl}_2\text{O}_4$ | Al           | $\text{Al}_2\text{O}_3$ | CaO          |
| Abbreviation                                        | C12A7                                                                                                                                        | CA                        | –            | –                       | –            |
| Space group                                         | $\bar{I}43d$                                                                                                                                 | $P2_1/c$                  | $Fm\bar{3}m$ | $R\bar{3}c$             | $Fm\bar{3}m$ |
| $a$ / pm                                            | 1202.55(4)                                                                                                                                   | 874.57(12)                | 405.39(7)    | 476.12(2)               | 482.0(2)     |
| $b$ / pm                                            | $a$                                                                                                                                          | 809.64(7)                 | $a$          | $a$                     | $a$          |
| $c$ / pm                                            | $a$                                                                                                                                          | 1744.39(18)               | $a$          | 1300.05(10)             | $a$          |
| $\beta$ / °                                         | 90                                                                                                                                           | 119.79(1)                 | 90           | 90                      | 90           |
| $V$ / $\text{nm}^3$                                 | 1.7390                                                                                                                                       | 1.0719                    | 0.0666       | 0.2552                  | 0.1120       |
| $Z$                                                 | 4                                                                                                                                            | 12                        | 4            | 6                       | 4            |
| $d$ -space range                                    | 0.85–14.35 Å (6–130° $2\theta$ )                                                                                                             |                           |              |                         |              |
| $\chi^2$                                            | 3.05                                                                                                                                         |                           |              |                         |              |
| $R_p$                                               | 7.69                                                                                                                                         |                           |              |                         |              |
| $R_{wp}$                                            | 10.41                                                                                                                                        |                           |              |                         |              |
| Definition of $R$ factors                           | $R_p = \frac{\sum  w   I_o - I_c ^2}{\sum  w  I_o^2};$ $R_{wp} = \left( \frac{\sum  w   I_o - I_c ^2}{\sum  w  I_o^2} \right)^{\frac{1}{2}}$ |                           |              |                         |              |

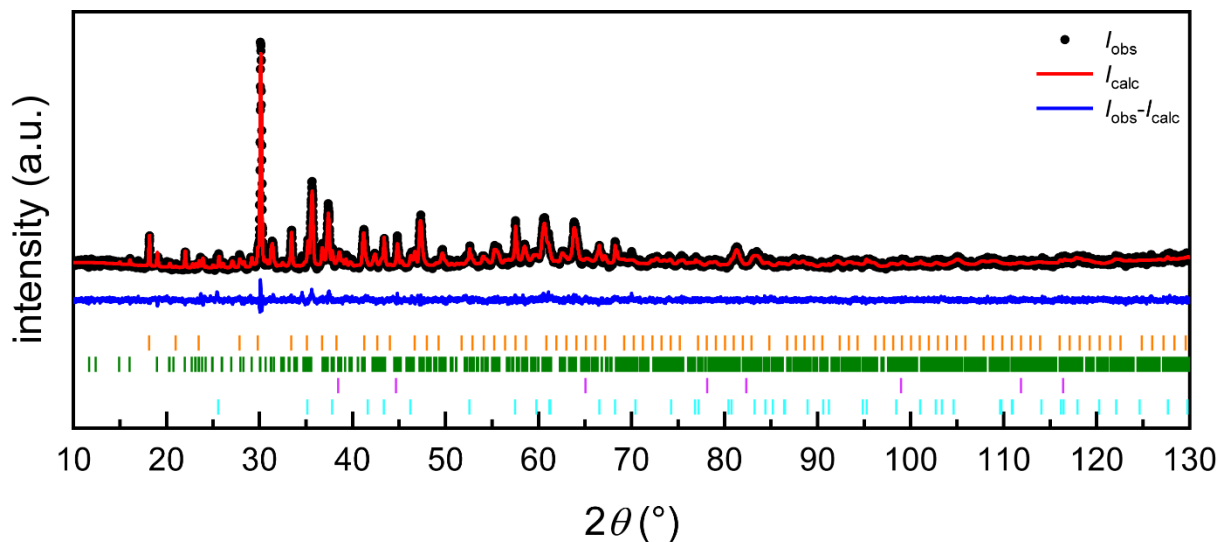

**Figure S22.** Rietveld fit of the powder X-ray diffraction pattern of  $\text{CaAl}_2$  oxidized by the following conditions: muffle furnace; heating rate:  $15 \text{ K min}^{-1}$ ; dwelling time: 20 h; total dwelling time: 37 h; air. The ticks indicate the Bragg positions for  $\text{Ca}_{12}\text{Al}_{14}\text{O}_{33}$  (orange),  $\text{CaAl}_2\text{O}_4$  (green), elemental Al (pink),  $\text{Al}_2\text{O}_3$  (cyan).

| Refinement details for the data shown in Figure S22 |                                                              |                           |              |                         |
|-----------------------------------------------------|--------------------------------------------------------------|---------------------------|--------------|-------------------------|
| Source                                              | Bruker D8 ADVANCE (laboratory X-ray)                         |                           |              |                         |
| Temperature                                         | RT                                                           |                           |              |                         |
| Pressure                                            | ambient                                                      |                           |              |                         |
| Wavelengths                                         | Cu $K\alpha_1$ and Cu $K\alpha_2$ : 154.0596 and 154.4308 pm |                           |              |                         |
| Chemical formula                                    | $\text{Ca}_{12}\text{Al}_{14}\text{O}_{33}$                  | $\text{CaAl}_2\text{O}_4$ | Al           | $\text{Al}_2\text{O}_3$ |
| Abbreviation                                        | C12A7                                                        | CA                        | –            | –                       |
| Space group                                         | $I\bar{4}3d$                                                 | $P2_1/c$                  | $Fm\bar{3}m$ | $R\bar{3}c$             |
| $a$ / pm                                            | 1200.12(7)                                                   | 874.65(8)                 | 405.17(11)   | 476.05(3)               |
| $b$ / pm                                            | $a$                                                          | 809.29(5)                 | $a$          | $a$                     |
| $c$ / pm                                            | $a$                                                          | 1743.83(11)               | $a$          | 1299.86(12)             |
| $\beta$ / °                                         | 90                                                           | 119.77(1)                 | 90           | 90                      |
| $V$ / $\text{nm}^3$                                 | 1.7285                                                       | 1.0714                    | 0.0665       | 0.2551                  |
| $Z$                                                 | 4                                                            | 12                        | 4            | 6                       |
| $d$ -space range                                    | 0.85–14.35 Å (6–130° $2\theta$ )                             |                           |              |                         |
| $\chi^2$                                            | 2.08                                                         |                           |              |                         |
| $R_p$                                               | 8.33                                                         |                           |              |                         |
| $R_{wp}$                                            | 10.95                                                        |                           |              |                         |
| Definition of $R$ factors                           | $R_p = \frac{\sum  w   I_o - I_c ^2}{\sum  w I_o^2 }^{1/2}$  |                           |              |                         |



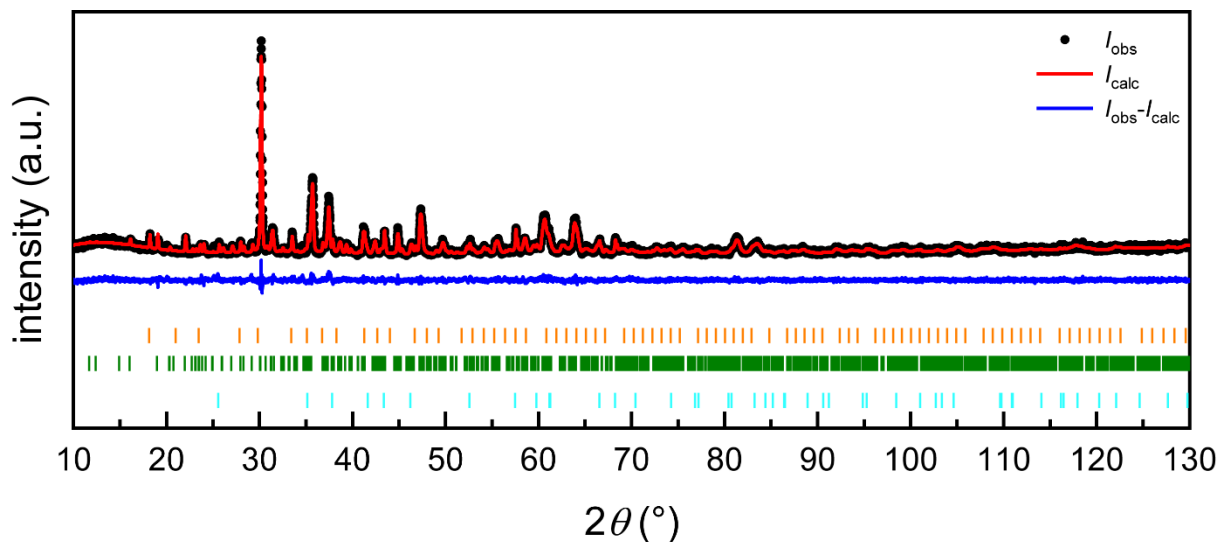

**Figure S23.** Rietveld fit of the powder X-ray diffraction pattern of  $\text{CaAl}_2$  oxidized by the following conditions: muffle furnace; heating rate:  $15 \text{ K min}^{-1}$ ; dwelling time: 20 h; total dwelling time: 57 h; air. The ticks indicate the Bragg positions for  $\text{Ca}_{12}\text{Al}_{14}\text{O}_{33}$  (orange),  $\text{CaAl}_2\text{O}_4$  (green),  $\text{Al}_2\text{O}_3$  (cyan).

| Refinement details for the data shown in Figure S23 |                                                              |                           |                         |
|-----------------------------------------------------|--------------------------------------------------------------|---------------------------|-------------------------|
| Source                                              | Bruker D8 ADVANCE (laboratory X-ray)                         |                           |                         |
| Temperature                                         | RT                                                           |                           |                         |
| Pressure                                            | ambient                                                      |                           |                         |
| Wavelengths                                         | Cu $K\alpha_1$ and Cu $K\alpha_2$ : 154.0596 and 154.4308 pm |                           |                         |
| Chemical formula                                    | $\text{Ca}_{12}\text{Al}_{14}\text{O}_{33}$                  | $\text{CaAl}_2\text{O}_4$ | $\text{Al}_2\text{O}_3$ |
| Abbreviation                                        | C12A7                                                        | CA                        | –                       |
| Space group                                         | $I\bar{4}3d$                                                 | $P2_1/c$                  | $R\bar{3}c$             |
| $a / \text{pm}$                                     | 1198.58(9)                                                   | 871.48(5)                 | 476.12(3)               |
| $b / \text{pm}$                                     | $a$                                                          | 809.26(4)                 | $a$                     |
| $c / \text{pm}$                                     | $a$                                                          | 1749.41(14)               | 1299.51(13)             |
| $\beta / ^\circ$                                    | 90                                                           | 119.78(1)                 | 90                      |
| $V / \text{nm}^3$                                   | 1.7219                                                       | 1.0709                    | 0.2551                  |
| $Z$                                                 | 4                                                            | 12                        | 6                       |
| $d$ -space range                                    | 0.85-14.35 Å (6-130° $2\theta$ )                             |                           |                         |
| $\chi^2$                                            | 2.22                                                         |                           |                         |
| $R_p$                                               | 8.42                                                         |                           |                         |
| $R_{wp}$                                            | 12.18                                                        |                           |                         |
| Definition of $R$ factors                           | $R_p = \frac{\sum  w   I_0 - I_c ^2}{\sum  w I_0^2 }^{1/2}$  |                           |                         |

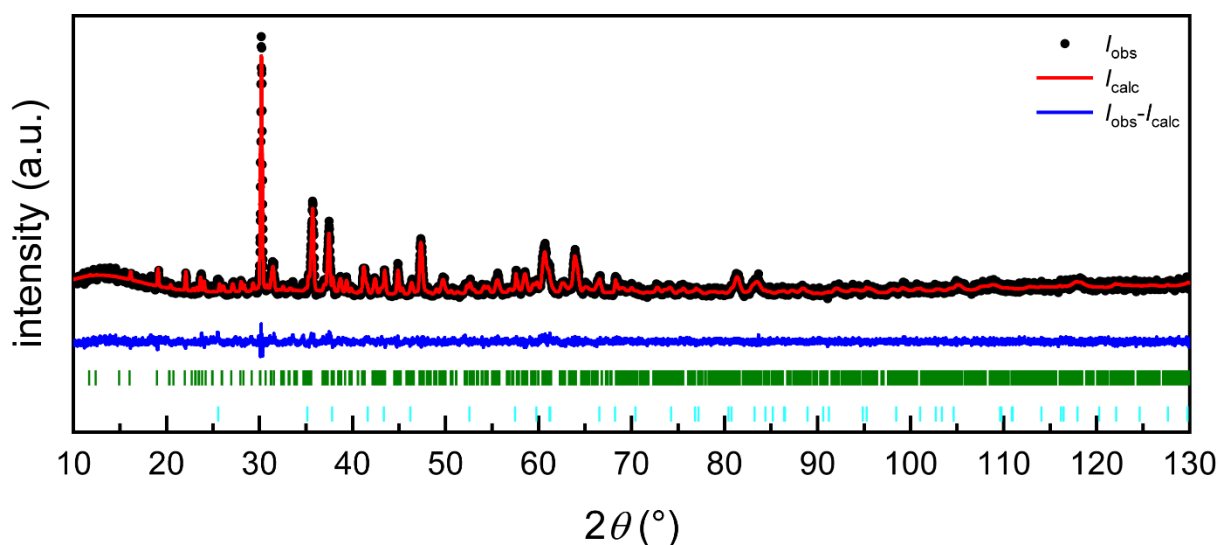

**Figure S24.** Rietveld fit of the powder X-ray diffraction pattern of  $\text{CaAl}_2$  oxidized by the following conditions: muffle furnace; heating rate:  $15 \text{ K min}^{-1}$ ; dwelling time: 20 h; total dwelling time: 77 h; air. The ticks indicate the Bragg positions for  $\text{CaAl}_2\text{O}_4$  (green),  $\text{Al}_2\text{O}_3$  (cyan).

| Refinement details for the data shown in Figure S24 |                                                                                                                                             |                         |
|-----------------------------------------------------|---------------------------------------------------------------------------------------------------------------------------------------------|-------------------------|
| Source                                              | Bruker D8 ADVANCE (laboratory X-ray)                                                                                                        |                         |
| Temperature                                         | RT                                                                                                                                          |                         |
| Pressure                                            | ambient                                                                                                                                     |                         |
| Wavelengths                                         | Cu $K\alpha_1$ and Cu $K\alpha_2$ : 154.0596 and 154.4308 pm                                                                                |                         |
| Chemical formula                                    | $\text{CaAl}_2\text{O}_4$                                                                                                                   | $\text{Al}_2\text{O}_3$ |
| Abbreviation                                        | CA                                                                                                                                          | –                       |
| Space group                                         | $P2_1/c$                                                                                                                                    | $R\bar{3}c$             |
| $a$ / pm                                            | 871.49(6)                                                                                                                                   | 476.21(4)               |
| $b$ / pm                                            | 809.41(6)                                                                                                                                   | $a$                     |
| $c$ / pm                                            | 1749.67(18)                                                                                                                                 | 1299.3(2)               |
| $\beta$ / °                                         | 119.78(1)                                                                                                                                   | 90                      |
| $V$ / nm <sup>3</sup>                               | 1.0712                                                                                                                                      | 0.2552                  |
| $Z$                                                 | 12                                                                                                                                          | 6                       |
| $d$ -space range                                    | 0.85-14.35 Å (6-130° $2\theta$ )                                                                                                            |                         |
| $\chi^2$                                            | 1.74                                                                                                                                        |                         |
| $R_p$                                               | 9.77                                                                                                                                        |                         |
| $R_{wp}$                                            | 12.71                                                                                                                                       |                         |
| Definition of $R$ factors                           | $R_p = \frac{\sum  w   I_o - I_c ^2}{\sum  w  I_o^2}$ $R_{wp} = \left( \frac{\sum  w   I_o - I_c ^2}{\sum  w  I_o^2} \right)^{\frac{1}{2}}$ |                         |

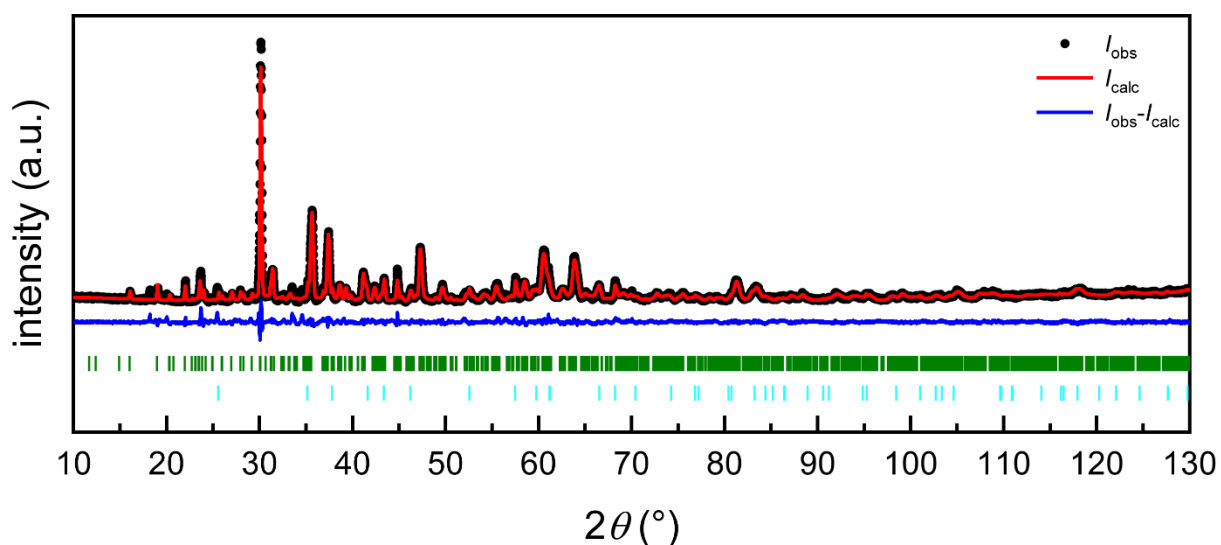

**Figure S25.** Rietveld fit of the powder X-ray diffraction pattern of  $\text{CaAl}_2$  oxidized by the following conditions: muffle furnace; heating rate:  $15 \text{ K min}^{-1}$ ; dwelling time: 20 h; total dwelling time: 97 h; air. The ticks indicate the Bragg positions for  $\text{CaAl}_2\text{O}_4$  (green), and  $\text{Al}_2\text{O}_3$  (cyan).

| Refinement details for the data shown in Figure S25 |                                                                                                                                             |                         |
|-----------------------------------------------------|---------------------------------------------------------------------------------------------------------------------------------------------|-------------------------|
| Source                                              | Bruker D8 ADVANCE (laboratory X-ray)                                                                                                        |                         |
| Temperature                                         | RT                                                                                                                                          |                         |
| Pressure                                            | ambient                                                                                                                                     |                         |
| Wavelengths                                         | Cu $K\alpha_1$ and Cu $K\alpha_2$ : 154.0596 and 154.4308 pm                                                                                |                         |
| Chemical formula                                    | $\text{CaAl}_2\text{O}_4$                                                                                                                   | $\text{Al}_2\text{O}_3$ |
| Abbreviation                                        | CA                                                                                                                                          | –                       |
| Space group                                         | $P2_1/c$                                                                                                                                    | $R\bar{3}c$             |
| $a$ / pm                                            | 871.45(5)                                                                                                                                   | 476.13(4)               |
| $b$ / pm                                            | 809.38(4)                                                                                                                                   | $a$                     |
| $c$ / pm                                            | 1749.77(15)                                                                                                                                 | 1299.27(17)             |
| $\beta$ / °                                         | 119.78(1)                                                                                                                                   | 90                      |
| $V$ / $\text{nm}^3$                                 | 1.0712                                                                                                                                      | 0.2551                  |
| $Z$                                                 | 12                                                                                                                                          | 6                       |
| $d$ -space range                                    | 0.85-14.35 Å (6-130° $2\theta$ )                                                                                                            |                         |
| $\chi^2$                                            | 3.08                                                                                                                                        |                         |
| $R_p$                                               | 8.16                                                                                                                                        |                         |
| $R_{wp}$                                            | 12.22                                                                                                                                       |                         |
| Definition of $R$ factors                           | $R_p = \frac{\sum  w   I_o - I_c ^2}{\sum  w  I_o^2}$ $R_{wp} = \left( \frac{\sum  w   I_o - I_c ^2}{\sum  w  I_o^2} \right)^{\frac{1}{2}}$ |                         |

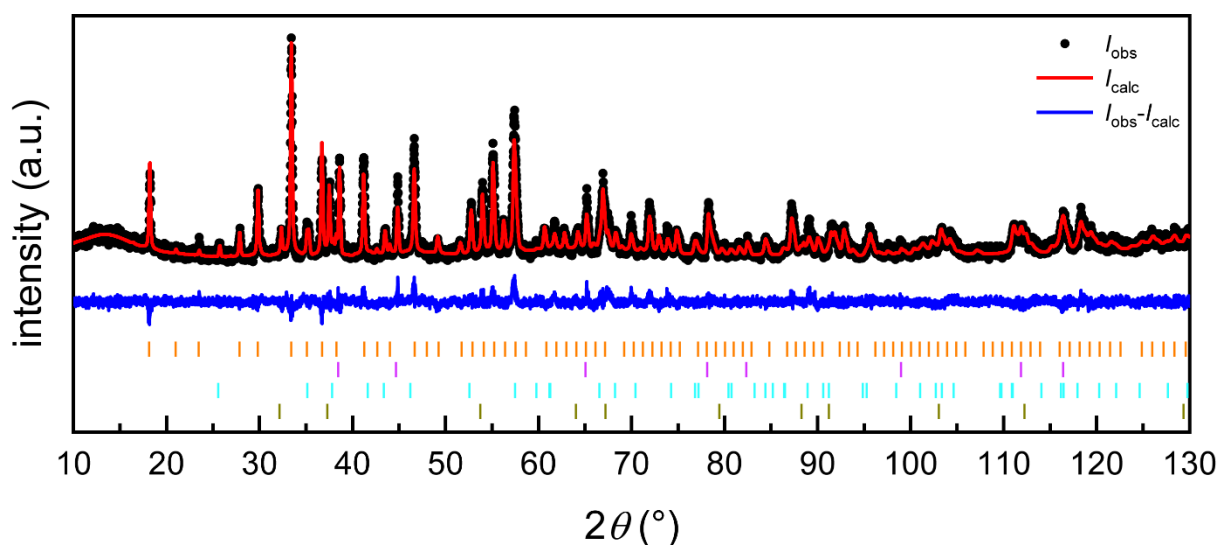

**Figure S26.** Rietveld fit of the powder X-ray diffraction pattern of  $\text{CaAl}_2$  oxidized by the following conditions: muffle furnace; heating rate:  $15 \text{ K min}^{-1}$ ; dwelling time: 0 h; number of cycle: 1; air. The ticks indicate the Bragg positions for  $\text{Ca}_{12}\text{Al}_{14}\text{O}_{33}$  (orange), elemental Al (pink),  $\text{Al}_2\text{O}_3$  (cyan), CaO (olive).

| Refinement details for the data shown in Figure S26 |                                                              |              |                         |              |
|-----------------------------------------------------|--------------------------------------------------------------|--------------|-------------------------|--------------|
| Source                                              | Bruker D8 ADVANCE (laboratory X-ray)                         |              |                         |              |
| Temperature                                         | RT                                                           |              |                         |              |
| Pressure                                            | ambient                                                      |              |                         |              |
| Wavelengths                                         | Cu $K\alpha_1$ and Cu $K\alpha_2$ : 154.0596 and 154.4308 pm |              |                         |              |
| Chemical formula                                    | $\text{Ca}_{12}\text{Al}_{14}\text{O}_{33}$                  | Al           | $\text{Al}_2\text{O}_3$ | CaO          |
| Abbreviation                                        | C12A7                                                        | –            | –                       | –            |
| Space group                                         | $I\bar{4}3d$                                                 | $Fm\bar{3}m$ | $R\bar{3}c$             | $Fm\bar{3}m$ |
| $a$ / pm                                            | 1204.28(3)                                                   | 405.43(1)    | 476.43(6)               | 481.65(2)    |
| $b$ / pm                                            | $a$                                                          | $a$          | $a$                     | $a$          |
| $c$ / pm                                            | $a$                                                          | $a$          | 1301.5(3)               | $a$          |
| $\beta$ / °                                         | 90                                                           | 90           | 90                      | 90           |
| $V$ / $\text{nm}^3$                                 | 1.7466                                                       | 0.0666       | 0.2559                  | 0.1117       |
| $Z$                                                 | 4                                                            | 4            | 6                       | 4            |
| $d$ -space range                                    | 0.85-14.35 Å (6-130° $2\theta$ )                             |              |                         |              |
| $\chi^2$                                            | 2.04                                                         |              |                         |              |
| $R_p$                                               | 9.74                                                         |              |                         |              |
| $R_{wp}$                                            | 12.65                                                        |              |                         |              |
| Definition of $R$ factors                           | $R_p = \frac{\sum  w   I_0 - I_c ^2}{\sum  w  I_0^2}$        |              |                         |              |

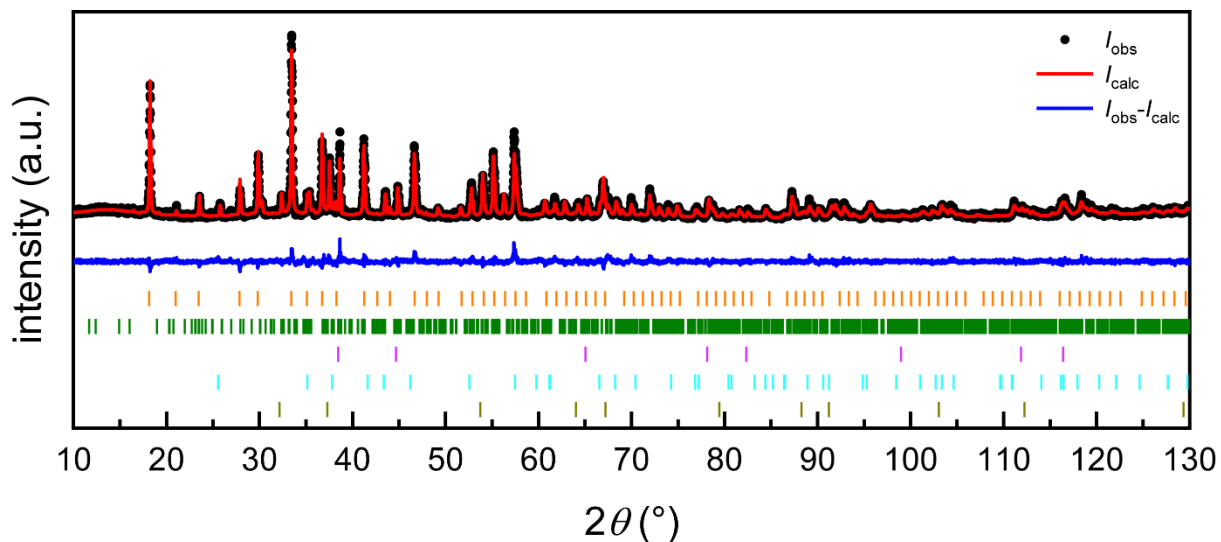

**Figure S27.** Rietveld fit of the powder X-ray diffraction pattern of  $\text{CaAl}_2$  oxidized by the following conditions: muffle furnace; heating rate:  $15 \text{ K min}^{-1}$ ; dwelling time: 0 h; number of cycle: 2; air. The ticks indicate the Bragg positions for  $\text{Ca}_{12}\text{Al}_{14}\text{O}_{33}$  (orange),  $\text{CaAl}_2\text{O}_4$  (green), elemental Al (pink),  $\text{Al}_2\text{O}_3$  (cyan), CaO (olive).

| Refinement details for the data shown in Figure S27 |                                                                                                                                              |                           |              |                         |              |
|-----------------------------------------------------|----------------------------------------------------------------------------------------------------------------------------------------------|---------------------------|--------------|-------------------------|--------------|
| Source                                              | Bruker D8 ADVANCE (laboratory X-ray)                                                                                                         |                           |              |                         |              |
| Temperature                                         | RT                                                                                                                                           |                           |              |                         |              |
| Pressure                                            | ambient                                                                                                                                      |                           |              |                         |              |
| Wavelengths                                         | Cu $K\alpha_1$ and Cu $K\alpha_2$ : 154.0596 and 154.4308 pm                                                                                 |                           |              |                         |              |
| Chemical formula                                    | $\text{Ca}_{12}\text{Al}_{14}\text{O}_{33}$                                                                                                  | $\text{CaAl}_2\text{O}_4$ | Al           | $\text{Al}_2\text{O}_3$ | CaO          |
| Abbreviation                                        | C12A7                                                                                                                                        | CA                        | –            | –                       | –            |
| Space group                                         | $\bar{I}43d$                                                                                                                                 | $P2_1/c$                  | $Fm\bar{3}m$ | $R\bar{3}c$             | $Fm\bar{3}m$ |
| $a$ / pm                                            | 1203.84(2)                                                                                                                                   | 877.2(14)                 | 405.30(1)    | 476.11(3)               | 481.39(2)    |
| $b$ / pm                                            | $a$                                                                                                                                          | 808.0(5)                  | $a$          | $a$                     | $a$          |
| $c$ / pm                                            | $a$                                                                                                                                          | 1749(3)                   | $a$          | 1300.03(14)             | $a$          |
| $\beta$ / °                                         | 90                                                                                                                                           | 120.0(2)                  | 90           | 90                      | 90           |
| $V$ / $\text{nm}^3$                                 | 1.7447                                                                                                                                       | 1.0740                    | 0.0666       | 0.2552                  | 0.1116       |
| $Z$                                                 | 4                                                                                                                                            | 12                        | 4            | 6                       | 4            |
| $d$ -space range                                    | 0.85-14.35 Å (6-130° $2\theta$ )                                                                                                             |                           |              |                         |              |
| $\chi^2$                                            | 2.33                                                                                                                                         |                           |              |                         |              |
| $R_p$                                               | 9.89                                                                                                                                         |                           |              |                         |              |
| $R_{wp}$                                            | 12.44                                                                                                                                        |                           |              |                         |              |
| Definition of $R$ factors                           | $R_p = \frac{\sum  w   I_o - I_c ^2}{\sum  w  I_o^2};$ $R_{wp} = \left( \frac{\sum  w   I_o - I_c ^2}{\sum  w  I_o^2} \right)^{\frac{1}{2}}$ |                           |              |                         |              |

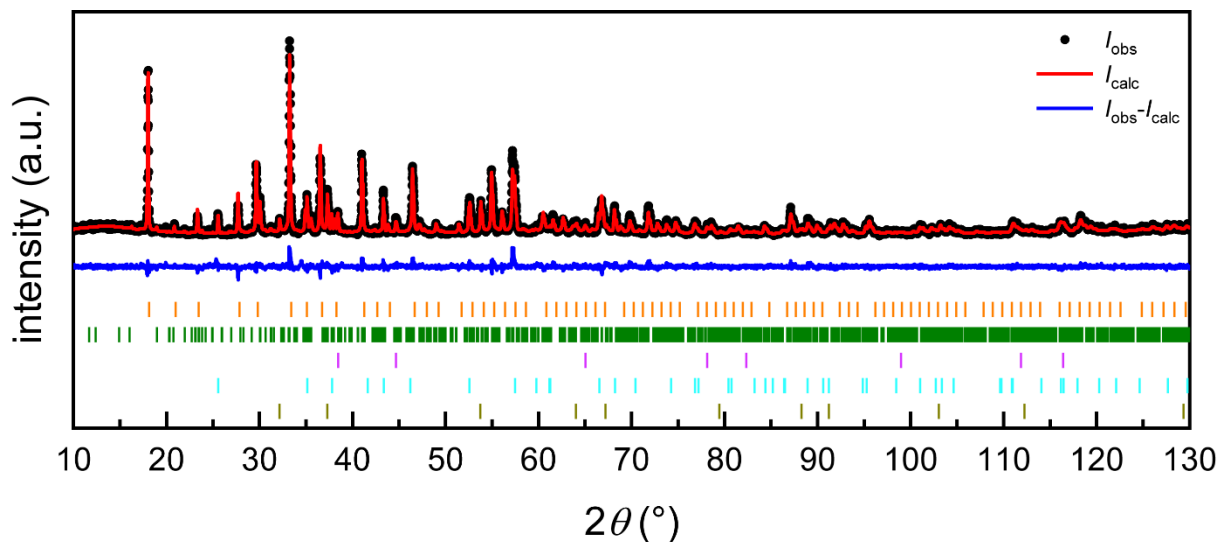

**Figure S28.** Rietveld fit of the powder X-ray diffraction pattern of  $\text{CaAl}_2$  oxidized by the following conditions: muffle furnace; heating rate:  $15 \text{ K min}^{-1}$ ; dwelling time: 0 h; number of cycle: 9; air. The ticks indicate the Bragg positions for  $\text{Ca}_{12}\text{Al}_{14}\text{O}_{33}$  (orange),  $\text{CaAl}_2\text{O}_4$  (green), elemental Al (pink),  $\text{Al}_2\text{O}_3$  (cyan), CaO (olive).

| Refinement details for the data shown in Figure S28 |                                                              |                           |              |                         |              |
|-----------------------------------------------------|--------------------------------------------------------------|---------------------------|--------------|-------------------------|--------------|
| Source                                              | Bruker D8 ADVANCE (laboratory X-ray)                         |                           |              |                         |              |
| Temperature                                         | RT                                                           |                           |              |                         |              |
| Pressure                                            | ambient                                                      |                           |              |                         |              |
| Wavelengths                                         | Cu $K\alpha_1$ and Cu $K\alpha_2$ : 154.0596 and 154.4308 pm |                           |              |                         |              |
| Chemical formula                                    | $\text{Ca}_{12}\text{Al}_{14}\text{O}_{33}$                  | $\text{CaAl}_2\text{O}_4$ | Al           | $\text{Al}_2\text{O}_3$ | CaO          |
| Abbreviation                                        | C12A7                                                        | CA                        | –            | –                       | –            |
| Space group                                         | $I\bar{4}3d$                                                 | $P2_1/c$                  | $Fm\bar{3}m$ | $R\bar{3}c$             | $Fm\bar{3}m$ |
| $a$ / pm                                            | 1203.65(2)                                                   | 876.0(3)                  | 405.37(2)    | 476.10(1)               | 481.41(2)    |
| $b$ / pm                                            | $a$                                                          | 809.46(14)                | $a$          | $a$                     | $a$          |
| $c$ / pm                                            | $a$                                                          | 1746.0(4)                 | $a$          | 1299.91(7)              | $a$          |
| $\beta$ / °                                         | 90                                                           | 119.93(4)                 | 90           | 90                      | 90           |
| $V$ / nm <sup>3</sup>                               | 1.7438                                                       | 1.0729                    | 0.0666       | 0.2552                  | 0.1116       |
| $Z$                                                 | 4                                                            | 12                        | 4            | 6                       | 4            |
| $d$ -space range                                    | 0.85-14.35 Å (6-130° $2\theta$ )                             |                           |              |                         |              |
| $\chi^2$                                            | 2.10                                                         |                           |              |                         |              |
| $R_p$                                               | 8.89                                                         |                           |              |                         |              |
| $R_{wp}$                                            | 11.41                                                        |                           |              |                         |              |
| Definition of $R$ factors                           | $R_p = \frac{\sum  w   I_0 - I_c ^2}{\sum  w  I_0^2}$        |                           |              |                         |              |

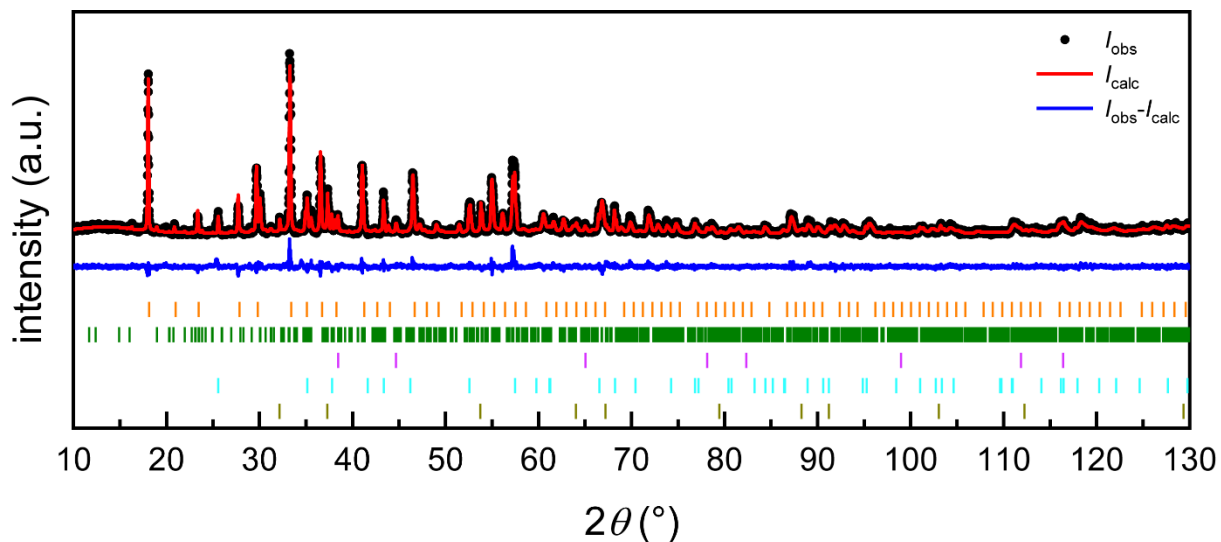

**Figure S29.** Rietveld fit of the powder X-ray diffraction pattern of  $\text{CaAl}_2$  oxidized by the following conditions: muffle furnace; heating rate:  $15 \text{ K min}^{-1}$ ; dwelling time: 0 h; number of cycle: 10; air. The ticks indicate the Bragg positions for  $\text{Ca}_{12}\text{Al}_{14}\text{O}_{33}$  (orange),  $\text{CaAl}_2\text{O}_4$  (green), elemental Al (pink),  $\text{Al}_2\text{O}_3$  (cyan), CaO (olive).

| Refinement details for the data shown in Figure S29 |                                                                                                                                              |                           |              |                         |              |
|-----------------------------------------------------|----------------------------------------------------------------------------------------------------------------------------------------------|---------------------------|--------------|-------------------------|--------------|
| Source                                              | Bruker D8 ADVANCE (laboratory X-ray)                                                                                                         |                           |              |                         |              |
| Temperature                                         | RT                                                                                                                                           |                           |              |                         |              |
| Pressure                                            | ambient                                                                                                                                      |                           |              |                         |              |
| Wavelengths                                         | Cu $K\alpha_1$ and Cu $K\alpha_2$ : 154.0596 and 154.4308 pm                                                                                 |                           |              |                         |              |
| Chemical formula                                    | $\text{Ca}_{12}\text{Al}_{14}\text{O}_{33}$                                                                                                  | $\text{CaAl}_2\text{O}_4$ | Al           | $\text{Al}_2\text{O}_3$ | CaO          |
| Abbreviation                                        | C12A7                                                                                                                                        | CA                        | –            | –                       | –            |
| Space group                                         | $\bar{I}43d$                                                                                                                                 | $P2_1/c$                  | $Fm\bar{3}m$ | $R\bar{3}c$             | $Fm\bar{3}m$ |
| $a$ / pm                                            | 1203.24(2)                                                                                                                                   | 876.3(2)                  | 405.42(3)    | 476.13(1)               | 481.43(2)    |
| $b$ / pm                                            | $a$                                                                                                                                          | 809.39(13)                | $a$          | $a$                     | $a$          |
| $c$ / pm                                            | $a$                                                                                                                                          | 1746.3(4)                 | $a$          | 1299.80(7)              | $a$          |
| $\beta$ / °                                         | 90                                                                                                                                           | 119.96(3)                 | 90           | 90                      | 90           |
| $V$ / $\text{nm}^3$                                 | 1.7421                                                                                                                                       | 1.0731                    | 0.0666       | 0.2552                  | 0.1116       |
| $Z$                                                 | 4                                                                                                                                            | 12                        | 4            | 6                       | 4            |
| $d$ -space range                                    | 0.85–14.35 Å (6–130° $2\theta$ )                                                                                                             |                           |              |                         |              |
| $\chi^2$                                            | 2.08                                                                                                                                         |                           |              |                         |              |
| $R_p$                                               | 8.84                                                                                                                                         |                           |              |                         |              |
| $R_{wp}$                                            | 11.35                                                                                                                                        |                           |              |                         |              |
| Definition of $R$ factors                           | $R_p = \frac{\sum  w   I_o - I_c ^2}{\sum  w  I_o^2};$ $R_{wp} = \left( \frac{\sum  w   I_o - I_c ^2}{\sum  w  I_o^2} \right)^{\frac{1}{2}}$ |                           |              |                         |              |

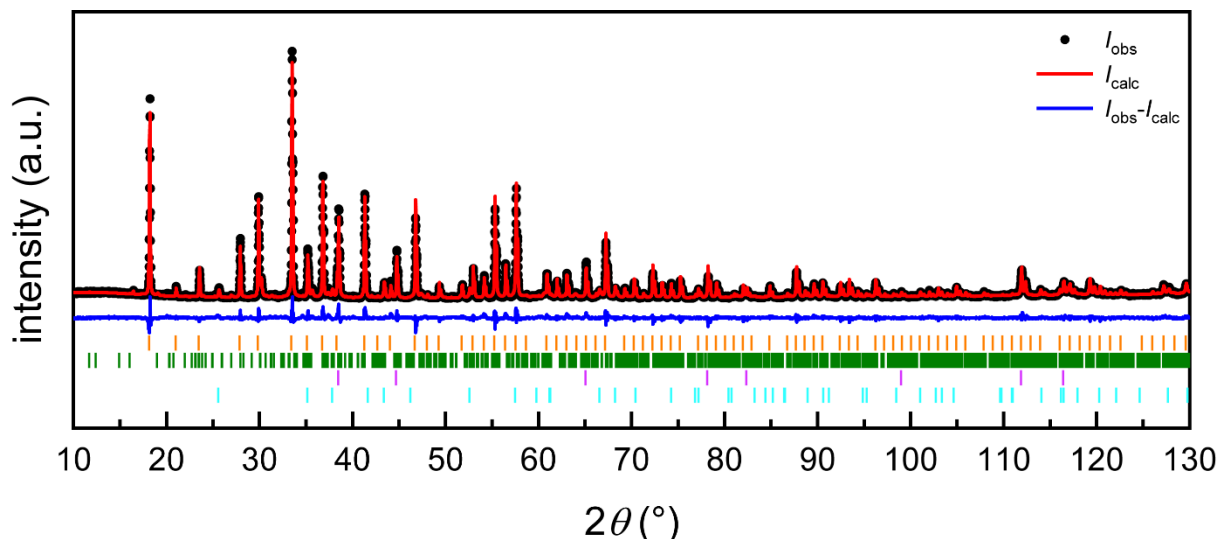

**Figure S30.** Rietveld fit of the powder X-ray diffraction pattern of  $\text{CaAl}_2$  oxidized by the following conditions: tube furnace; heating rate:  $4 \text{ K min}^{-1}$ ; dwelling time: 0 h; gas flow:  $20 \text{ mL min}^{-1}$  dried Ar :  $20 \text{ mL min}^{-1}$   $\text{O}_2$ . The ticks indicate the Bragg positions for  $\text{Ca}_{12}\text{Al}_{14}\text{O}_{33}$  (orange),  $\text{CaAl}_2\text{O}_4$  (green), elemental Al (pink),  $\text{Al}_2\text{O}_3$  (cyan).

| Refinement details for the data shown in Figure S30 |                                                                                                                                              |                           |              |                         |
|-----------------------------------------------------|----------------------------------------------------------------------------------------------------------------------------------------------|---------------------------|--------------|-------------------------|
| Source                                              | Bruker D8 ADVANCE (laboratory X-ray)                                                                                                         |                           |              |                         |
| Temperature                                         | RT                                                                                                                                           |                           |              |                         |
| Pressure                                            | ambient                                                                                                                                      |                           |              |                         |
| Wavelengths                                         | Cu $K\alpha_1$ and Cu $K\alpha_2$ : 154.0596 and 154.4308 pm                                                                                 |                           |              |                         |
| Chemical formula                                    | $\text{Ca}_{12}\text{Al}_{14}\text{O}_{33}$                                                                                                  | $\text{CaAl}_2\text{O}_4$ | Al           | $\text{Al}_2\text{O}_3$ |
| Abbreviation                                        | C12A7                                                                                                                                        | CA                        | –            | –                       |
| Space group                                         | $I\bar{4}3d$                                                                                                                                 | $P2_1/c$                  | $Fm\bar{3}m$ | $R\bar{3}c$             |
| $a$ / pm                                            | 1197.77(1)                                                                                                                                   | 874.7(3)                  | 405.23(1)    | 475.97(2)               |
| $b$ / pm                                            | $a$                                                                                                                                          | 808.36(17)                | $a$          | $a$                     |
| $c$ / pm                                            | $a$                                                                                                                                          | 1746.5(9)                 | $a$          | 1299.60(9)              |
| $\beta$ / °                                         | 90                                                                                                                                           | 120.03(6)                 | 90           | 90                      |
| $V$ / $\text{nm}^3$                                 | 1.7184                                                                                                                                       | 1.0691                    | 0.0665       | 0.2550                  |
| $Z$                                                 | 4                                                                                                                                            | 12                        | 4            | 6                       |
| $d$ -space range                                    | 0.85-14.35 Å (6-130° $2\theta$ )                                                                                                             |                           |              |                         |
| $\chi^2$                                            | 5.67                                                                                                                                         |                           |              |                         |
| $R_p$                                               | 7.97                                                                                                                                         |                           |              |                         |
| $R_{wp}$                                            | 10.6                                                                                                                                         |                           |              |                         |
| Definition of $R$ factors                           | $R_p = \frac{\sum  w   I_o - I_c ^2}{\sum  w  I_o^2};$ $R_{wp} = \left( \frac{\sum  w   I_o - I_c ^2}{\sum  w  I_o^2} \right)^{\frac{1}{2}}$ |                           |              |                         |



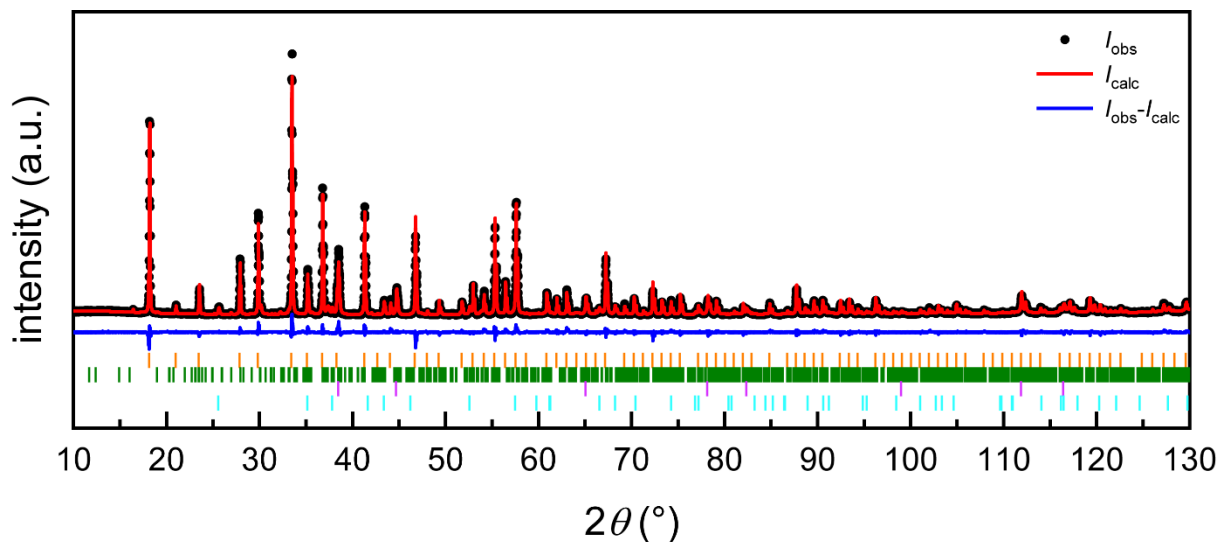

**Figure S31.** Rietveld fit of the powder X-ray diffraction pattern of  $\text{CaAl}_2$  oxidized by the following conditions: tube furnace; heating rate:  $4 \text{ K min}^{-1}$ ; dwelling time: 0 h; gas flow:  $20 \text{ mL min}^{-1} \text{ O}_2$ . The ticks indicate the Bragg positions for  $\text{Ca}_{12}\text{Al}_{14}\text{O}_{33}$  (orange),  $\text{CaAl}_2\text{O}_4$  (green), elemental Al (pink),  $\text{Al}_2\text{O}_3$  (cyan), CaO (olive).

| Refinement details for the data shown in Figure S31 |                                                              |                           |              |                         |
|-----------------------------------------------------|--------------------------------------------------------------|---------------------------|--------------|-------------------------|
| Source                                              | Bruker D8 ADVANCE (laboratory X-ray)                         |                           |              |                         |
| Temperature                                         | RT                                                           |                           |              |                         |
| Pressure                                            | ambient                                                      |                           |              |                         |
| Wavelengths                                         | Cu $K\alpha_1$ and Cu $K\alpha_2$ : 154.0596 and 154.4308 pm |                           |              |                         |
| Chemical formula                                    | $\text{Ca}_{12}\text{Al}_{14}\text{O}_{33}$                  | $\text{CaAl}_2\text{O}_4$ | Al           | $\text{Al}_2\text{O}_3$ |
| Abbreviation                                        | C12A7                                                        | CA                        | –            | –                       |
| Space group                                         | $I\bar{4}3d$                                                 | $P2_1/c$                  | $Fm\bar{3}m$ | $R\bar{3}c$             |
| $a / \text{pm}$                                     | 1197.73(1)                                                   | 874.8(8)                  | 405.18(1)    | 475.96(1)               |
| $b / \text{pm}$                                     | $a$                                                          | 808.4(4)                  | $a$          | $a$                     |
| $c / \text{pm}$                                     | $a$                                                          | 1746(3)                   | $a$          | 1299.43(8)              |
| $\beta / ^\circ$                                    | 90                                                           | 120.1(2)                  | 90           | 90                      |
| $V / \text{nm}^3$                                   | 1.7182                                                       | 1.0690                    | 0.0665       | 0.2549                  |
| $Z$                                                 | 4                                                            | 12                        | 4            | 6                       |
| $d$ -space range                                    | 0.85–14.35 Å (6–130° $2\theta$ )                             |                           |              |                         |
| $\chi^2$                                            | 4.90                                                         |                           |              |                         |
| $R_p$                                               | 7.09                                                         |                           |              |                         |
| $R_{wp}$                                            | 9.41                                                         |                           |              |                         |
| Definition of $R$ factors                           | $R_p = \frac{\sum  w   I_0 - I_c ^2}{\sum  w I_0^2 }^{1/2}$  |                           |              |                         |

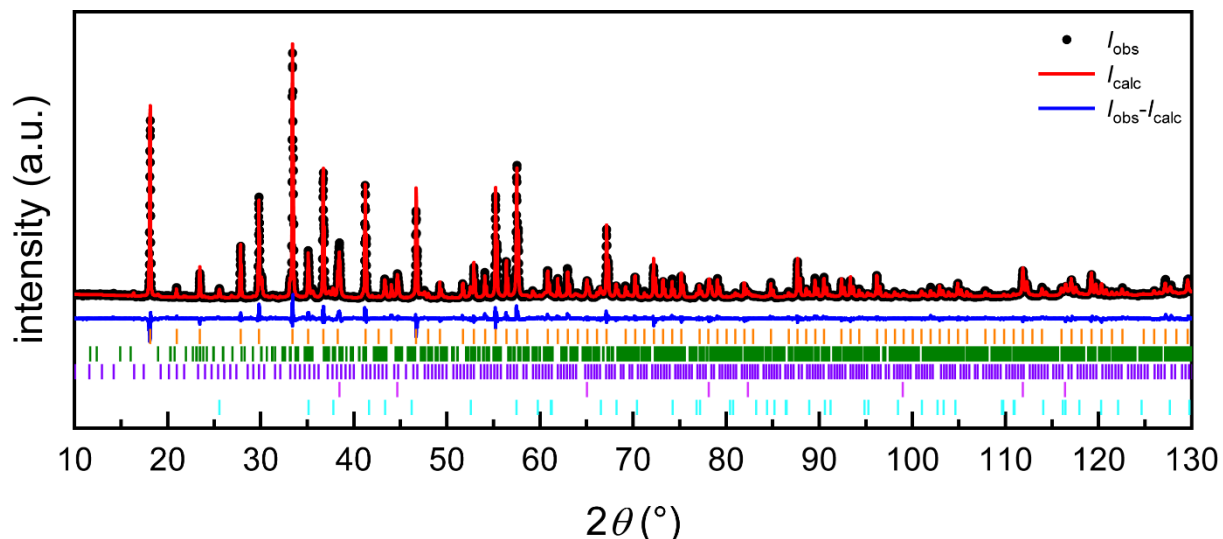

**Figure S32.** Rietveld fit of the powder X-ray diffraction pattern of  $\text{CaAl}_2$  oxidized by the following conditions: tube furnace; heating rate:  $4 \text{ K min}^{-1}$ ; dwelling time: 5 h; gas flow:  $20 \text{ mL min}^{-1} \text{ O}_2$ . The ticks indicate the Bragg positions for  $\text{Ca}_{12}\text{Al}_{14}\text{O}_{33}$  (orange),  $\text{CaAl}_2\text{O}_4$  (green),  $\text{Ca}_3\text{Al}_2\text{O}_6$  (purple), elemental Al (pink),  $\text{Al}_2\text{O}_3$  (cyan).

| Refinement details for the data shown in Figure S32 |                                                                                                                                              |                           |                                    |              |                         |
|-----------------------------------------------------|----------------------------------------------------------------------------------------------------------------------------------------------|---------------------------|------------------------------------|--------------|-------------------------|
| Source                                              | Bruker D8 ADVANCE (laboratory X-ray)                                                                                                         |                           |                                    |              |                         |
| Temperature                                         | RT                                                                                                                                           |                           |                                    |              |                         |
| Pressure                                            | ambient                                                                                                                                      |                           |                                    |              |                         |
| Wavelengths                                         | Cu $K\alpha_1$ and Cu $K\alpha_2$ : 154.0596 and 154.4308 pm                                                                                 |                           |                                    |              |                         |
| Chemical formula                                    | $\text{Ca}_{12}\text{Al}_{14}\text{O}_{33}$                                                                                                  | $\text{CaAl}_2\text{O}_4$ | $\text{Ca}_3\text{Al}_2\text{O}_6$ | Al           | $\text{Al}_2\text{O}_3$ |
| Abbreviation                                        | C12A7                                                                                                                                        | CA                        | C3A1                               | –            | –                       |
| Space group                                         | $I\bar{4}3d$                                                                                                                                 | $P2_1/c$                  | $Pa\bar{3}$                        | $Fm\bar{3}m$ | $R\bar{3}c$             |
| $a / \text{pm}$                                     | 1197.93(1)                                                                                                                                   | 871.82(17)                | 1527.08(8)                         | 405.18(1)    | 476.03(1)               |
| $b / \text{pm}$                                     | $a$                                                                                                                                          | 809.08(14)                | $a$                                | $a$          | $a$                     |
| $c / \text{pm}$                                     | $a$                                                                                                                                          | 1748.7(4)                 | $a$                                | $a$          | 1299.55(7)              |
| $\beta / ^\circ$                                    | 90                                                                                                                                           | 119.81(2)                 | 90                                 | 90           | 90                      |
| $V / \text{nm}^3$                                   | 1.7191                                                                                                                                       | 1.0703                    | 3.5611                             | 0.0665       | 0.2550                  |
| $Z$                                                 | 4                                                                                                                                            | 12                        | 24                                 | 4            | 6                       |
| $d$ -space range                                    | 0.85–14.35 Å (6–130° $2\theta$ )                                                                                                             |                           |                                    |              |                         |
| $\chi^2$                                            | 5.36                                                                                                                                         |                           |                                    |              |                         |
| $R_p$                                               | 7.12                                                                                                                                         |                           |                                    |              |                         |
| $R_{wp}$                                            | 9.4                                                                                                                                          |                           |                                    |              |                         |
| Definition of $R$ factors                           | $R_p = \frac{\sum  w   I_o - I_c ^2}{\sum  w  I_o^2};$ $R_{wp} = \left( \frac{\sum  w   I_o - I_c ^2}{\sum  w  I_o^2} \right)^{\frac{1}{2}}$ |                           |                                    |              |                         |

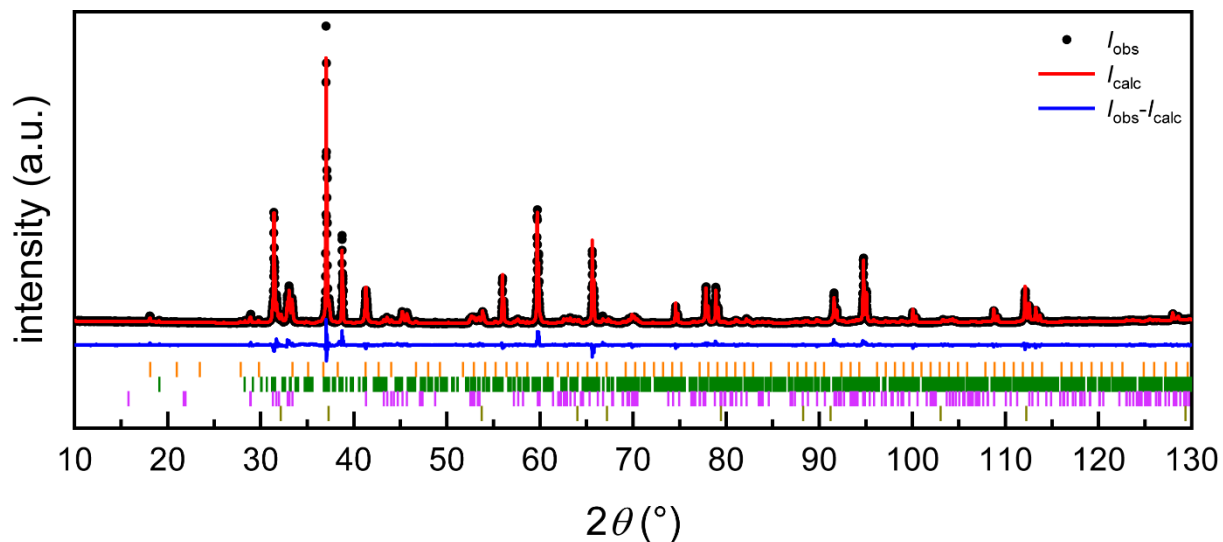

**Figure S33.** Rietveld fit of the powder X-ray diffraction pattern of  $\text{CaAl}_2$  oxidized by the following conditions: induction furnace; The ticks indicate the Bragg positions for  $\text{Ca}_{12}\text{Al}_{14}\text{O}_{33}$  (orange),  $\text{CaAl}_2$  (green),  $\text{CaAl}_4$  (pink),  $\text{CaO}$  (olive).

| Refinement details for the data shown in Figure S33 |                                                                                                                                             |                 |                 |              |
|-----------------------------------------------------|---------------------------------------------------------------------------------------------------------------------------------------------|-----------------|-----------------|--------------|
| Source                                              | Bruker D8 ADVANCE (laboratory X-ray)                                                                                                        |                 |                 |              |
| Temperature                                         | RT                                                                                                                                          |                 |                 |              |
| Pressure                                            | ambient                                                                                                                                     |                 |                 |              |
| Wavelengths                                         | Cu $K\alpha_1$ and Cu $K\alpha_2$ : 154.0596 and 154.4308 pm                                                                                |                 |                 |              |
| Chemical formula                                    | $\text{Ca}_{12}\text{Al}_{14}\text{O}_{33}$                                                                                                 | $\text{CaAl}_2$ | $\text{CaAl}_4$ | $\text{CaO}$ |
| Abbreviation                                        | C12A7                                                                                                                                       | –               | –               | –            |
| Space group                                         | $I\bar{4}3d$                                                                                                                                | $Fd\bar{3}m$    | $C2/m$          | $Fm\bar{3}m$ |
| $a$ / pm                                            | 1198.89(6)                                                                                                                                  | 803.98(1)       | 616.83(2)       | 481.156(9)   |
| $b$ / pm                                            | $a$                                                                                                                                         | $a$             | 618.83(2)       | $a$          |
| $c$ / pm                                            | $a$                                                                                                                                         | $a$             | 634.48(2)       | $a$          |
| $\beta$ / °                                         | 90                                                                                                                                          | 90              | 118.06(1)       | 90           |
| $V$ / nm <sup>3</sup>                               | 1.7232                                                                                                                                      | 0.5197          | 0.2135          | 0.1114       |
| $Z$                                                 | 4                                                                                                                                           | 8               | 2               | 4            |
| $d$ -space range                                    | 0.85-14.35 Å (6-130° $2\theta$ )                                                                                                            |                 |                 |              |
| $\chi^2$                                            | 5.12                                                                                                                                        |                 |                 |              |
| $R_p$                                               | 7.43                                                                                                                                        |                 |                 |              |
| $R_{wp}$                                            | 9.84                                                                                                                                        |                 |                 |              |
| Definition of $R$ factors                           | $R_p = \frac{\sum  w   I_0 - I_c ^2}{\sum  w  I_0^2}$ $R_{wp} = \left( \frac{\sum  w   I_0 - I_c ^2}{\sum  w  I_0^2} \right)^{\frac{1}{2}}$ |                 |                 |              |

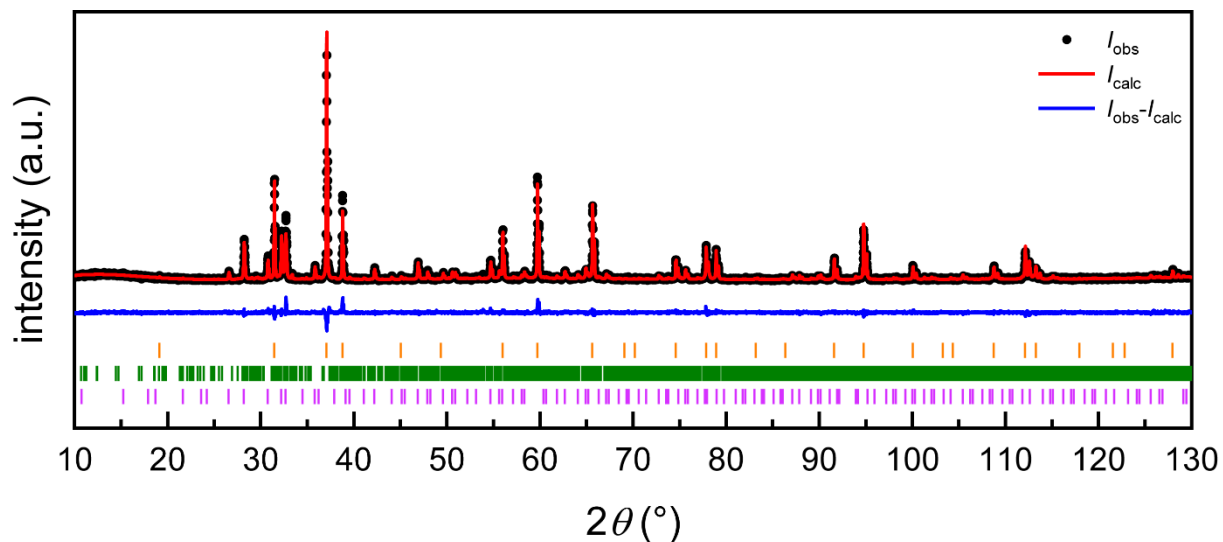

**Figure S34.** Rietveld fit of the powder X-ray diffraction pattern taken from nominal ‘Ca<sub>6</sub>Al<sub>7</sub>’. The ticks indicate the Bragg positions for CaAl<sub>2</sub> (orange), Ca<sub>8</sub>Al<sub>3</sub> (green), Ca<sub>11</sub>Al<sub>7</sub> (purple).

| Refinement details for the data shown in Figure S34 |                                                                                                                                              |                                 |                                  |
|-----------------------------------------------------|----------------------------------------------------------------------------------------------------------------------------------------------|---------------------------------|----------------------------------|
| Source                                              | Bruker D8 ADVANCE (laboratory X-ray)                                                                                                         |                                 |                                  |
| Temperature                                         | RT                                                                                                                                           |                                 |                                  |
| Pressure                                            | ambient                                                                                                                                      |                                 |                                  |
| Wavelengths                                         | Cu K $\alpha_1$ and Cu K $\alpha_2$ : 154.0596 and 154.4308 pm                                                                               |                                 |                                  |
| Chemical formula                                    | CaAl <sub>2</sub>                                                                                                                            | Ca <sub>8</sub> Al <sub>3</sub> | Ca <sub>11</sub> Al <sub>7</sub> |
| Space group                                         | <i>Fd</i> $\bar{3}m$                                                                                                                         | <i>P</i> $\bar{1}$              | <i>Fm</i> $\bar{3}m$             |
| <i>a</i> / pm                                       | 804.03(1)                                                                                                                                    | 948.5(2)                        | 1642.92(1)                       |
| <i>b</i> / pm                                       | <i>a</i>                                                                                                                                     | 966.6(2)                        | <i>a</i>                         |
| <i>c</i> / pm                                       | <i>a</i>                                                                                                                                     | 957.4(3)                        | <i>a</i>                         |
| $\alpha$ / °                                        | 90                                                                                                                                           | 99.57(2)                        | 90                               |
| $\beta$ / °                                         | 90                                                                                                                                           | 100.99(2)                       | 90                               |
| $\gamma$ / °                                        | 90                                                                                                                                           | 119.32(2)                       | 90                               |
| <i>V</i> / nm <sup>3</sup>                          | 0.5198                                                                                                                                       | 0.7159                          | 4.4346                           |
| <i>Z</i>                                            | 8                                                                                                                                            | 2                               | 8                                |
| <i>d</i> -space range                               | 0.85-14.35 Å (6-130° 2 $\theta$ )                                                                                                            |                                 |                                  |
| $\chi^2$                                            | 1.58                                                                                                                                         |                                 |                                  |
| <i>R</i> <sub>p</sub>                               | 8.77                                                                                                                                         |                                 |                                  |
| <i>R</i> <sub>wp</sub>                              | 11.48                                                                                                                                        |                                 |                                  |
| Definition of <i>R</i> factors                      | $R_p = \frac{\sum  w   I_0 - I_c ^2}{\sum  w  I_0^2};$ $R_{wp} = \left( \frac{\sum  w   I_0 - I_c ^2}{\sum  w  I_0^2} \right)^{\frac{1}{2}}$ |                                 |                                  |

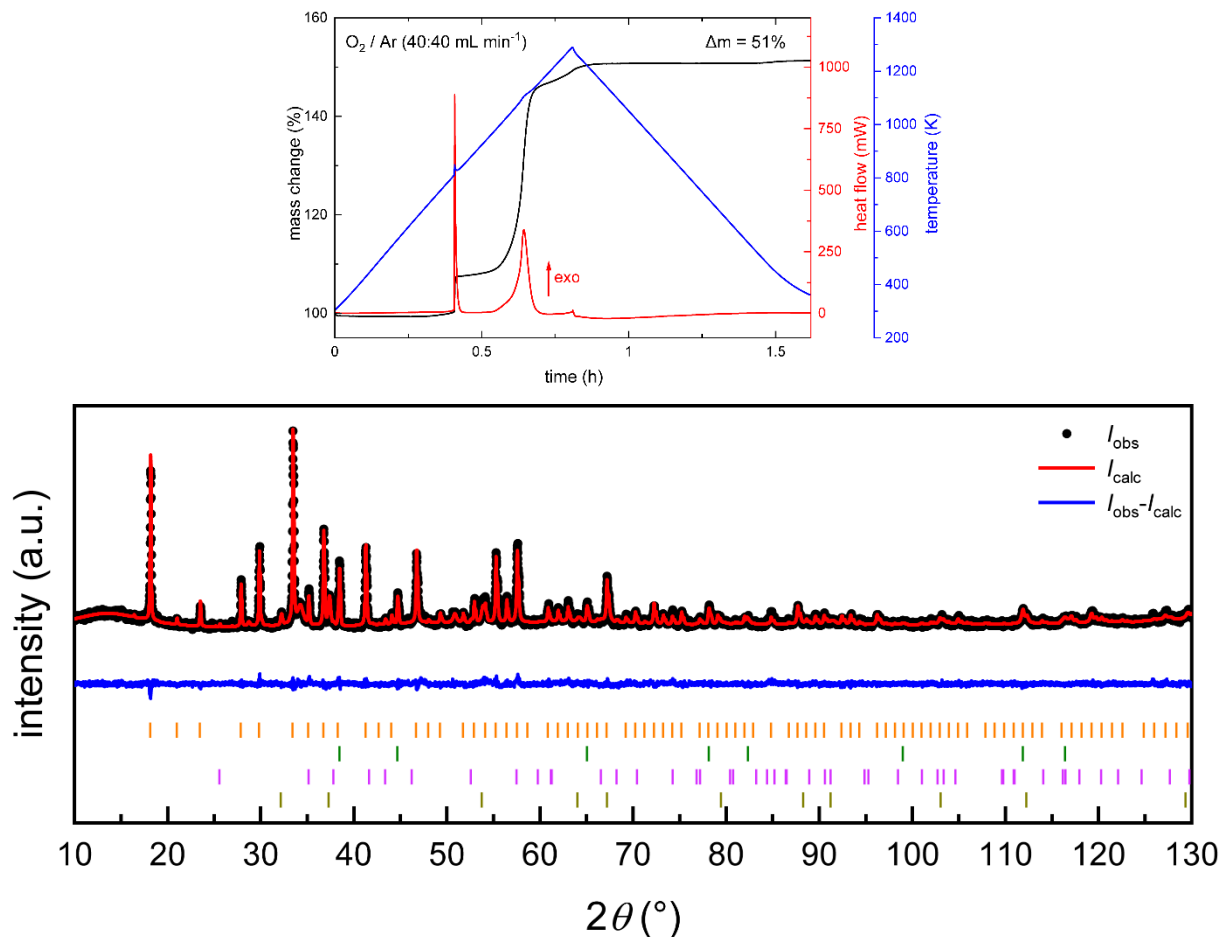

**Figure S35.** STA experiment (top) and the corresponding Rietveld refinements of the collected powder X-ray diffraction data (bottom) of the oxidation of nominal ‘Ca<sub>6</sub>Al<sub>7</sub>’. The ticks indicate the Bragg positions for Ca<sub>12</sub>Al<sub>14</sub>O<sub>33</sub> (orange), Al (green), Al<sub>2</sub>O<sub>3</sub> (pink), CaO (olive).

| Refinement details for the data shown in Figure S35 |                                                                                                                                              |                      |                                |                      |
|-----------------------------------------------------|----------------------------------------------------------------------------------------------------------------------------------------------|----------------------|--------------------------------|----------------------|
| Source                                              | Bruker D8 ADVANCE (laboratory X-ray)                                                                                                         |                      |                                |                      |
| Temperature                                         | RT                                                                                                                                           |                      |                                |                      |
| Pressure                                            | ambient                                                                                                                                      |                      |                                |                      |
| Wavelengths                                         | Cu K $\alpha_1$ and Cu K $\alpha_2$ : 154.0596 and 154.4308 pm                                                                               |                      |                                |                      |
| Chemical formula                                    | Ca <sub>12</sub> Al <sub>14</sub> O <sub>33</sub>                                                                                            | Al                   | Al <sub>2</sub> O <sub>3</sub> | CaO                  |
| Abbreviation                                        | C12A7                                                                                                                                        | –                    | –                              | –                    |
| Space group                                         | <i>I</i> $\bar{4}3d$                                                                                                                         | <i>Fm</i> $\bar{3}m$ | <i>R</i> $\bar{3}c$            | <i>Fm</i> $\bar{3}m$ |
| <i>a</i> / pm                                       | 1198.00(2)                                                                                                                                   | 405.43(2)            | 475.65(11)                     | 481.58(4)            |
| <i>b</i> / pm                                       | <i>a</i>                                                                                                                                     | <i>a</i>             | <i>a</i>                       | <i>a</i>             |
| <i>c</i> / pm                                       | <i>a</i>                                                                                                                                     | <i>a</i>             | 1301.4(8)                      | <i>a</i>             |
| $\beta$ / °                                         | 90                                                                                                                                           | 90                   | 90                             | 90                   |
| <i>V</i> / nm <sup>3</sup>                          | 1.7194                                                                                                                                       | 0.0666               | 0.2552                         | 0.1117               |
| <i>Z</i>                                            | 4                                                                                                                                            | 4                    | 6                              | 4                    |
| <i>d</i> -space range                               | 0.85-14.35 Å (6-130° 2 $\theta$ )                                                                                                            |                      |                                |                      |
| $\chi^2$                                            | 2.87                                                                                                                                         |                      |                                |                      |
| <i>R</i> <sub>p</sub>                               | 8.77                                                                                                                                         |                      |                                |                      |
| <i>R</i> <sub>wp</sub>                              | 11.95                                                                                                                                        |                      |                                |                      |
| Definition of <i>R</i> factors                      | $R_p = \frac{\sum  w   I_o - I_c ^2}{\sum  w  I_o^2};$ $R_{wp} = \left( \frac{\sum  w   I_o - I_c ^2}{\sum  w  I_o^2} \right)^{\frac{1}{2}}$ |                      |                                |                      |

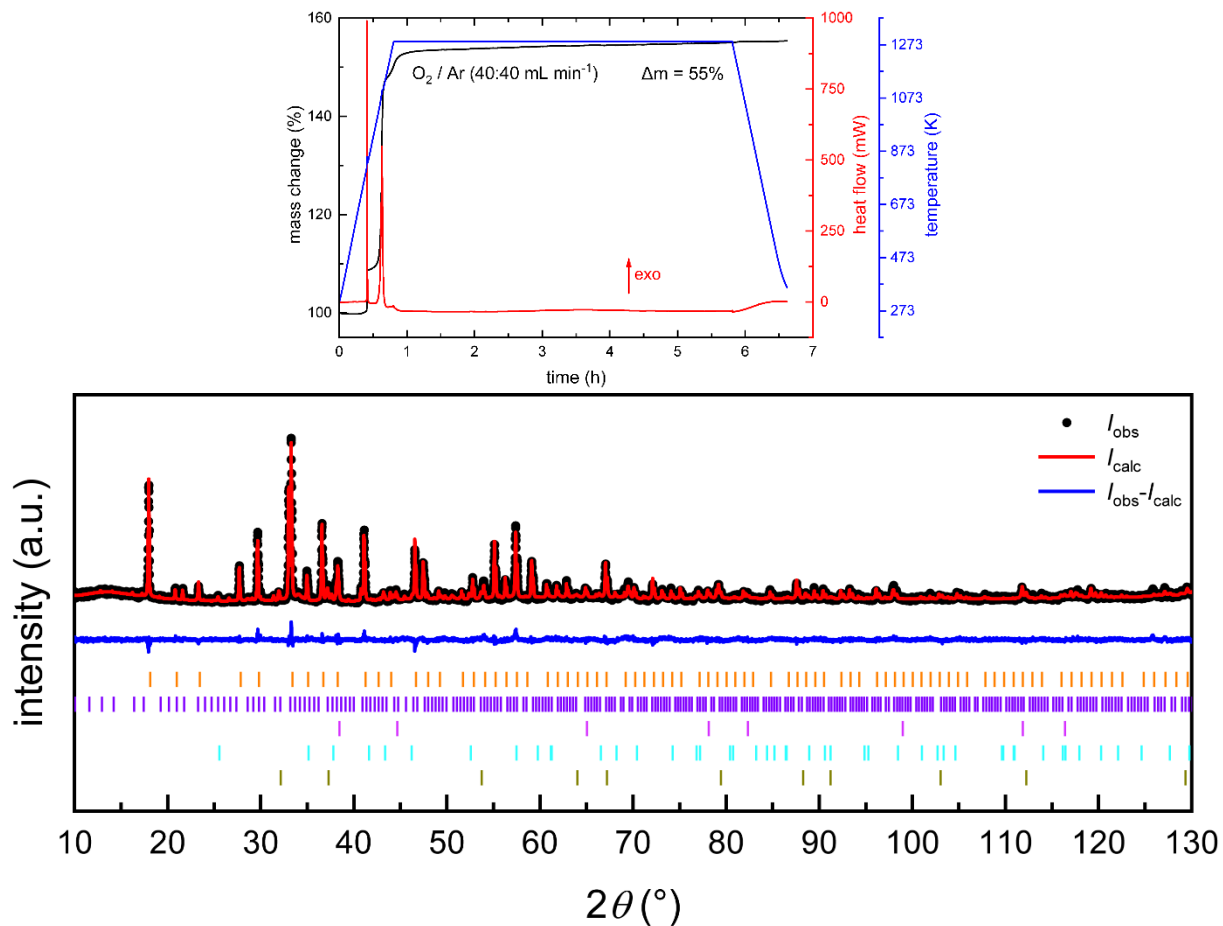

**Figure S36.** STA experiment (top) and the corresponding Rietveld refinements of the collected powder X-ray diffraction data (bottom) of the oxidation of nominal ‘Ca<sub>6</sub>Al<sub>7</sub>’. The ticks indicate the Bragg positions for Ca<sub>12</sub>Al<sub>14</sub>O<sub>33</sub> (orange), Al (green), Al<sub>2</sub>O<sub>3</sub> (pink), CaO (olive).

| Refinement details for the data shown in Figure S36 |                                                                |                                                |              |                                |              |
|-----------------------------------------------------|----------------------------------------------------------------|------------------------------------------------|--------------|--------------------------------|--------------|
| Source                                              | Bruker D8 ADVANCE (laboratory X-ray)                           |                                                |              |                                |              |
| Temperature                                         | RT                                                             |                                                |              |                                |              |
| Pressure                                            | ambient                                                        |                                                |              |                                |              |
| Wavelengths                                         | Cu K $\alpha_1$ and Cu K $\alpha_2$ : 154.0596 and 154.4308 pm |                                                |              |                                |              |
| Chemical formula                                    | Ca <sub>12</sub> Al <sub>14</sub> O <sub>33</sub>              | Ca <sub>3</sub> Al <sub>2</sub> O <sub>6</sub> | Al           | Al <sub>2</sub> O <sub>3</sub> | CaO          |
| Abbreviation                                        | C12A7                                                          | C3A1                                           | –            | –                              | –            |
| Space group                                         | $I\bar{4}3d$                                                   | $Pa\bar{3}$                                    | $Fm\bar{3}m$ | $R\bar{3}c$                    | $Fm\bar{3}m$ |
| $a$ / pm                                            | 1197.77(1)                                                     | 1526.96(3)                                     | 405.34(2)    | 476.00(4)                      | 481.48(5)    |
| $b$ / pm                                            | $a$                                                            | $a$                                            | $a$          | $a$                            | $a$          |
| $c$ / pm                                            | $a$                                                            | $a$                                            | $a$          | 1300.1(2)                      | $a$          |
| $\beta$ / °                                         | 90                                                             | 90                                             | 90           | 90                             | 90           |
| $V$ / nm <sup>3</sup>                               | 1.7184                                                         | 3.5602                                         | 0.0666       | 0.2551                         | 0.1112       |
| $Z$                                                 | 4                                                              | 24                                             | 4            | 6                              | 4            |
| $d$ -space range                                    | 0.85-14.35 Å (6-130° 2 $\theta$ )                              |                                                |              |                                |              |
| $\chi^2$                                            | 2.67                                                           |                                                |              |                                |              |
| $R_p$                                               | 8.52                                                           |                                                |              |                                |              |
| $R_{wp}$                                            | 10.86                                                          |                                                |              |                                |              |
| Definition of $R$ factors                           | $R_p = \frac{\sum  w   I_o - I_c ^2}{\sum  w  I_o^2}$          |                                                |              |                                |              |

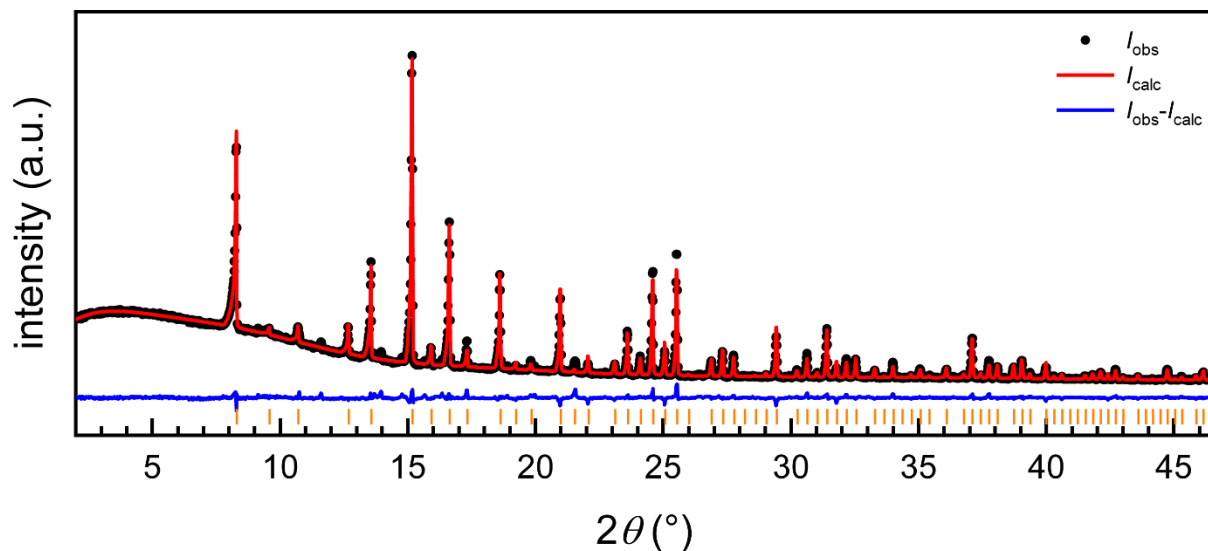

**Figure S37.** Rietveld refinements of the collected powder X-ray diffraction data for the result of the solid-state reaction between  $\text{Ca}(\text{NO}_3)_2 \cdot 4 \text{H}_2\text{O}$  and  $\text{Al}(\text{NO}_3)_3 \cdot 9 \text{H}_2\text{O}$ . The ticks indicate the Bragg positions for  $\text{Ca}_{12}\text{Al}_{14}\text{O}_{33}$  (orange).

| Refinement details for the data shown in Figure S37 |                                                                                                                                              |
|-----------------------------------------------------|----------------------------------------------------------------------------------------------------------------------------------------------|
| Source                                              | Stoe Stadi P diffractometer (laboratory X-ray)                                                                                               |
| Temperature                                         | RT                                                                                                                                           |
| Pressure                                            | ambient                                                                                                                                      |
| Wavelengths                                         | Mo $K\alpha_1$ : 70.93 pm                                                                                                                    |
| Chemical formula                                    | $\text{Ca}_{12}\text{Al}_{14}\text{O}_{33}$                                                                                                  |
| Abbreviation                                        | C12A7                                                                                                                                        |
| Space group                                         | $I\bar{4}3d$                                                                                                                                 |
| $a$ / pm                                            | 1200.20(3)                                                                                                                                   |
| $b$ / pm                                            | $a$                                                                                                                                          |
| $c$ / pm                                            | $a$                                                                                                                                          |
| $\beta$ / °                                         | 90                                                                                                                                           |
| $V$ / nm <sup>3</sup>                               | 1.7289                                                                                                                                       |
| $Z$                                                 | 4                                                                                                                                            |
| $d$ -space range                                    | 0.91-20.08 Å (2-46° $2\theta$ )                                                                                                              |
| $\chi^2$                                            | 7.53                                                                                                                                         |
| $R_p$                                               | 3.07                                                                                                                                         |
| $R_{wp}$                                            | 4.94                                                                                                                                         |
| Definition of $R$ factors                           | $R_p = \frac{\sum  w   I_0 - I_c ^2}{\sum  w  I_0^2};$ $R_{wp} = \left( \frac{\sum  w   I_0 - I_c ^2}{\sum  w  I_0^2} \right)^{\frac{1}{2}}$ |

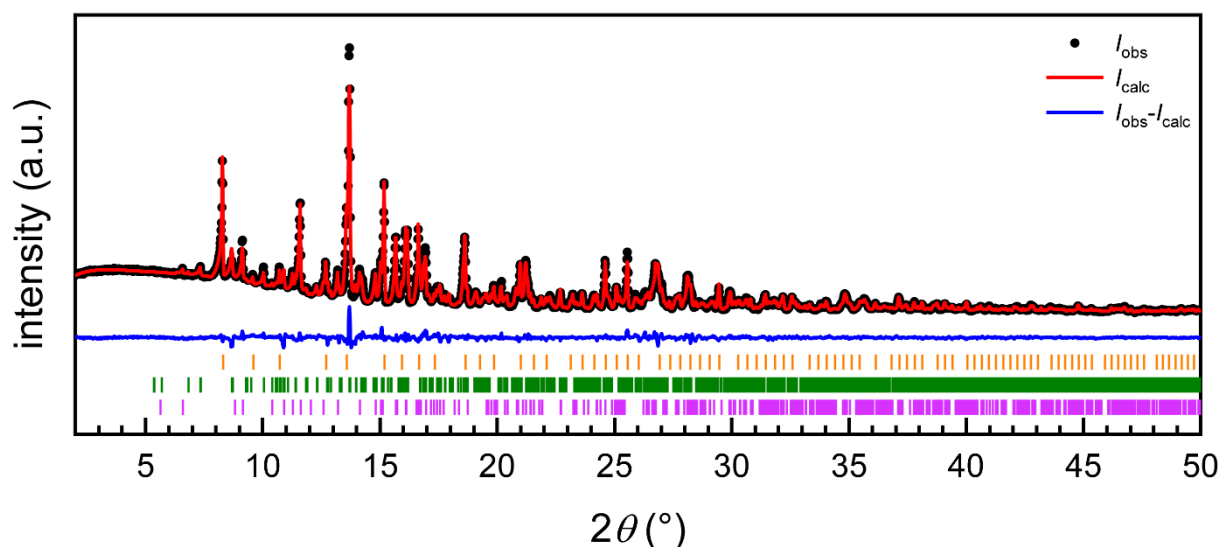

**Figure S38.** Rietveld refinements of the collected powder X-ray diffraction data for the result of the solid-state reaction between  $\text{Ca}(\text{NO}_3)_2 \cdot 4 \text{H}_2\text{O}$  and  $2 \text{Al}(\text{NO}_3)_3 \cdot 9 \text{H}_2\text{O}$ . The ticks indicate the Bragg positions for  $\text{Ca}_{12}\text{Al}_{14}\text{O}_{33}$  (orange),  $\text{CaAl}_2\text{O}_4$  (green) and  $\text{CaAl}_4\text{O}_7$  (purple).

| Refinement details for the data shown in Figure S38 |                                                                                                                                              |                           |                           |
|-----------------------------------------------------|----------------------------------------------------------------------------------------------------------------------------------------------|---------------------------|---------------------------|
| Source                                              | Stoe Stadi P diffractometer (laboratory X-ray)                                                                                               |                           |                           |
| Temperature                                         | RT                                                                                                                                           |                           |                           |
| Pressure                                            | ambient                                                                                                                                      |                           |                           |
| Wavelengths                                         | Mo $K\alpha_1$ : 70.93 pm                                                                                                                    |                           |                           |
| Chemical formula                                    | $\text{Ca}_{12}\text{Al}_{14}\text{O}_{33}$                                                                                                  | $\text{CaAl}_2\text{O}_4$ | $\text{CaAl}_4\text{O}_7$ |
| Abbreviation                                        | C12A7                                                                                                                                        | CA                        | CA2                       |
| Space group                                         | $I\bar{4}3d$                                                                                                                                 | $P2_1/c$                  | $C2_1/c$                  |
| $a$ / pm                                            | 1198.99(7)                                                                                                                                   | 874.16(8)                 | 1289.14(10)               |
| $b$ / pm                                            | $a$                                                                                                                                          | 809.14(6)                 | 888.33(7)                 |
| $c$ / pm                                            | $a$                                                                                                                                          | 1741.93(13)               | 543.70(4)                 |
| $\beta$ / °                                         | 90                                                                                                                                           | 119.76(1)                 | 107.03(1)                 |
| $V$ / nm <sup>3</sup>                               | 1.7236                                                                                                                                       | 1.8965                    | 0.5953                    |
| $Z$                                                 | 4                                                                                                                                            | 12                        | 4                         |
| $d$ -space range                                    | 0.91-20.08 Å (2-46° $2\theta$ )                                                                                                              |                           |                           |
| $\chi^2$                                            | 14.35                                                                                                                                        |                           |                           |
| $R_p$                                               | 3.76                                                                                                                                         |                           |                           |
| $R_{wp}$                                            | 5.53                                                                                                                                         |                           |                           |
| Definition of $R$ factors                           | $R_p = \frac{\sum  w   I_0 - I_c ^2}{\sum  w  I_0^2};$ $R_{wp} = \left( \frac{\sum  w   I_0 - I_c ^2}{\sum  w  I_0^2} \right)^{\frac{1}{2}}$ |                           |                           |
